# Supplementary material for: Thermal decomposition of DMSO or DMF solvates: an advanced method for obtaining new hybrid bismuth(iii) halides
Source: Royal Society of Chemistry journal article supplement (doi:10.1039/d4ce00279b), 2024-01-01
Supplement: d4ce00279b1.pdf [file d4ce00279b1.pdf]

**Supplementary materials**

CrystEngComm

**Thermal decomposition of DMSO or DMF solvates: an advanced method for obtaining  
new hybrid bismuth(III) halides**

Ekaterina M. Dudko,<sup>ab</sup> Petr A. Buikin,<sup>\*b</sup> Andey B. Ilyukhin,<sup>b</sup> Alexander A. Korlyukov,<sup>c</sup> Pavel V.  
Dorovatovskii,<sup>d</sup> Nikolai P. Simonenko,<sup>b</sup> and Vitalii Yu. Kotov<sup>ab</sup>

<sup>a</sup>*HSE University, 101000 Moscow, Russian Federation.*

<sup>b</sup>*N. S. Kurnakov Institute of General and Inorganic Chemistry, Russian Academy of Sciences, 119991  
Moscow, Russian Federation. E-mail: peterzzz@mail.ru*

<sup>c</sup>*A. N. Nesmeyanov Institute of Organoelement Compounds, Russian Academy of Sciences, 119991  
Moscow, Russian Federation*

<sup>d</sup>*Kurchatov Institute, National Research Center, 123182 Moscow, Russian Federation*

\*Author for correspondence: peterzzz@mail.ru

## Table of content

|                                                                                                                                                                                                            |    |
|------------------------------------------------------------------------------------------------------------------------------------------------------------------------------------------------------------|----|
| <b>Table 1.</b> Crystal data and structure refinement for bromide, iodide and <b>I-VIII, X</b> .....                                                                                                       | 3  |
| <b>Fig. S1.</b> <sup>1</sup> H NMR spectra of [Py <sub>2</sub> (XK)]Cl <sub>2</sub> , [Py <sub>2</sub> (XK)]Br <sub>2</sub> , [Py <sub>2</sub> (XK)]I <sub>2</sub> .....                                   | 7  |
| <b>Fig. S2.</b> Pawley refinement profiles for [Py <sub>2</sub> (XK)]Br <sub>2</sub> , [Py <sub>2</sub> (XK)]I <sub>2</sub> , <b>I-XIII</b> .....                                                          | 15 |
| <b>Fig. S3.</b> Pawley refinement profiles for extracted [Py <sub>2</sub> (XK)]Br <sub>2</sub> from decomposed <b>I</b> and extracted [Py <sub>2</sub> (XK)]I <sub>2</sub> from decomposed <b>II</b> ..... | 16 |
| <b>Fig. S4.</b> PXRD profiles for compound <b>III</b> before and after UV irradiation .....                                                                                                                | 17 |
| <b>Fig. S5.</b> The reflectance spectra of <b>I-XIII</b> .....                                                                                                                                             | 20 |
| <b>Fig. S6.</b> TG and DTA curves on heating compounds <b>I, II, IV-XIII</b> .....                                                                                                                         | 24 |
| <b>Fig. S7.</b> Crystal packing of [Bi <sub>2</sub> I <sub>9</sub> ] <sup>3-</sup> anions in compound <b>IX</b> .....                                                                                      | 25 |
| <b>Fig. S8.</b> Crystal packing of [BiI <sub>6</sub> ] <sup>3-</sup> anions in compound <b>XI</b> .....                                                                                                    | 25 |
| <b>Fig. S9.</b> Crystal packing of [Bi <sub>4</sub> Br <sub>16</sub> ] <sup>4-</sup> anions in compound <b>XII</b> .....                                                                                   | 26 |
| <b>Fig. S10.</b> Crystal packing of [BiI <sub>4</sub> ] <sub>n</sub> <sup>n-</sup> anions in compound <b>XIII</b> .....                                                                                    | 26 |
| <b>Resulting CONTCAR files for compounds III and X</b> .....                                                                                                                                               | 27 |

**Table 1.** Crystal data and structure refinement for bromide, iodide and **I-VIII, X**.

| Identification code                         | <b>[Py<sub>2</sub>(XK)]Br<sub>2</sub></b>                        | <b>[Py<sub>2</sub>(XK)]I<sub>2</sub></b>                      | <b>I</b>                                                                                       | <b>II</b>                                                                                     | <b>III</b>                                                                                           |
|---------------------------------------------|------------------------------------------------------------------|---------------------------------------------------------------|------------------------------------------------------------------------------------------------|-----------------------------------------------------------------------------------------------|------------------------------------------------------------------------------------------------------|
| Empirical formula                           | C <sub>20</sub> H <sub>24</sub> Br <sub>2</sub> N <sub>2</sub> O | C <sub>18</sub> H <sub>18</sub> I <sub>2</sub> N <sub>2</sub> | C <sub>42</sub> H <sub>54</sub> BiBr <sub>7</sub> N <sub>4</sub> O <sub>3</sub> S <sub>3</sub> | C <sub>42</sub> H <sub>54</sub> BiI <sub>7</sub> N <sub>4</sub> O <sub>3</sub> S <sub>3</sub> | C <sub>54</sub> H <sub>54</sub> Bi <sub>2</sub> Br <sub>8.49</sub> Cl <sub>3.51</sub> N <sub>6</sub> |
| Formula weight                              | 468.23                                                           | 516.14                                                        | 1527.42                                                                                        | 1856.35                                                                                       | 2007.85                                                                                              |
| Temperature/K                               | 140                                                              | 150(2)                                                        | 100(2)                                                                                         | 100(2)                                                                                        | 140                                                                                                  |
| Crystal system                              | orthorhombic                                                     | monoclinic                                                    | monoclinic                                                                                     | monoclinic                                                                                    | triclinic                                                                                            |
| Space group                                 | Pbcm                                                             | P2 <sub>1</sub> /c                                            | C2/m                                                                                           | C2/m                                                                                          | P-1                                                                                                  |
| a/Å                                         | 12.7794(18)                                                      | 6.8222(5)                                                     | 16.5194(9)                                                                                     | 16.9076(7)                                                                                    | 12.790(3)                                                                                            |
| b/Å                                         | 8.1003(12)                                                       | 11.0457(8)                                                    | 14.5925(9)                                                                                     | 15.1942(7)                                                                                    | 14.769(4)                                                                                            |
| c/Å                                         | 19.956(3)                                                        | 12.1817(9)                                                    | 13.2748(7)                                                                                     | 13.5491(6)                                                                                    | 19.156(5)                                                                                            |
| α/°                                         | 90                                                               | 90                                                            | 90                                                                                             | 90                                                                                            | 67.593(5)                                                                                            |
| β/°                                         | 90                                                               | 94.692(2)                                                     | 125.2900(10)                                                                                   | 125.4550(10)                                                                                  | 73.276(5)                                                                                            |
| γ/°                                         | 90                                                               | 90                                                            | 90                                                                                             | 90                                                                                            | 80.529(7)                                                                                            |
| Volume/Å <sup>3</sup>                       | 2065.8(5)                                                        | 914.89(12)                                                    | 2612.0(3)                                                                                      | 2835.3(2)                                                                                     | 3197.5(13)                                                                                           |
| Z                                           | 4                                                                | 2                                                             | 2                                                                                              | 2                                                                                             | 2                                                                                                    |
| ρ <sub>calc</sub> /cm <sup>3</sup>          | 1.505                                                            | 1.874                                                         | 1.942                                                                                          | 2.174                                                                                         | 2.085                                                                                                |
| μ/mm <sup>-1</sup>                          | 3.934                                                            | 3.436                                                         | 8.889                                                                                          | 7.068                                                                                         | 10.987                                                                                               |
| F(000)                                      | 944                                                              | 492                                                           | 1468                                                                                           | 1720                                                                                          | 1886                                                                                                 |
| Crystal size/mm <sup>3</sup>                | 0.25 × 0.01 × 0.01                                               | 0.4 × 0.4 × 0.08                                              | 0.3 × 0.24 × 0.24                                                                              | 0.12 × 0.1 × 0.04                                                                             | 0.15 × 0.15 × 0.08                                                                                   |
| Radiation                                   | MoKα (λ = 0.71073)                                               | MoKα (λ = 0.71073)                                            | MoKα (λ = 0.71073)                                                                             | MoKα (λ = 0.71073)                                                                            | MoKα (λ = 0.71073)                                                                                   |
| 2θ range for data collection/°              | 4.082 to 60.176                                                  | 4.986 to 63.058                                               | 4.112 to 63.086                                                                                | 4.11 to 66.358                                                                                | 2.372 to 52.044                                                                                      |
| Index ranges                                | -16 ≤ h ≤ 15, -6 ≤ k ≤ 11, -28 ≤ l ≤ 21                          | -10 ≤ h ≤ 10, -16 ≤ k ≤ 15, -17 ≤ l ≤ 17                      | -24 ≤ h ≤ 23, -21 ≤ k ≤ 21, -19 ≤ l ≤ 19                                                       | -26 ≤ h ≤ 25, -23 ≤ k ≤ 22, -20 ≤ l ≤ 20                                                      | -15 ≤ h ≤ 14, -18 ≤ k ≤ 18, -21 ≤ l ≤ 23                                                             |
| Reflections collected                       | 8538                                                             | 14879                                                         | 22807                                                                                          | 25970                                                                                         | 40876                                                                                                |
| Independent reflections                     | 2992 [R <sub>int</sub> = 0.0410, R <sub>sigma</sub> = 0.0673]    | 3033 [R <sub>int</sub> = 0.0386, R <sub>sigma</sub> = 0.0291] | 4494 [R <sub>int</sub> = 0.0428, R <sub>sigma</sub> = 0.0329]                                  | 5397 [R <sub>int</sub> = 0.0262, R <sub>sigma</sub> = 0.0215]                                 | 12597 [R <sub>int</sub> = 0.0542, R <sub>sigma</sub> = 0.0744]                                       |
| Data/restraints/parameters                  | 2992/0/123                                                       | 3033/0/100                                                    | 4494/18/162                                                                                    | 5397/18/162                                                                                   | 12597/5/718                                                                                          |
| Goodness-of-fit on F <sup>2</sup>           | 1.04                                                             | 1.115                                                         | 0.993                                                                                          | 0.971                                                                                         | 1.027                                                                                                |
| Final R indexes [I ≥ 2σ (I)]                | R <sub>1</sub> = 0.0357, wR <sub>2</sub> = 0.0806                | R <sub>1</sub> = 0.0274, wR <sub>2</sub> = 0.0689             | R <sub>1</sub> = 0.0259, wR <sub>2</sub> = 0.0579                                              | R <sub>1</sub> = 0.0215, wR <sub>2</sub> = 0.0466                                             | R <sub>1</sub> = 0.0487, wR <sub>2</sub> = 0.1086                                                    |
| Final R indexes [all data]                  | R <sub>1</sub> = 0.0610, wR <sub>2</sub> = 0.0846                | R <sub>1</sub> = 0.0299, wR <sub>2</sub> = 0.0699             | R <sub>1</sub> = 0.0315, wR <sub>2</sub> = 0.0601                                              | R <sub>1</sub> = 0.0261, wR <sub>2</sub> = 0.0484                                             | R <sub>1</sub> = 0.0721, wR <sub>2</sub> = 0.1182                                                    |
| Largest diff. peak/hole / e Å <sup>-3</sup> | 0.46/-0.52                                                       | 1.16/-0.81                                                    | 1.39/-1.65                                                                                     | 0.79/-1.47                                                                                    | 3.97/-2.59                                                                                           |

| Identification code                         | <b>IV</b>                                                     | <b>V</b>                                                      | <b>VI</b>                                                                       | <b>VII</b>                                                        |
|---------------------------------------------|---------------------------------------------------------------|---------------------------------------------------------------|---------------------------------------------------------------------------------|-------------------------------------------------------------------|
| Empirical formula                           | C <sub>11</sub> H <sub>15</sub> BiBr <sub>4</sub> NOS         | C <sub>11</sub> H <sub>15</sub> BiI <sub>4</sub> NOS          | C <sub>30</sub> H <sub>34</sub> Bi <sub>2</sub> I <sub>9</sub> N <sub>4</sub> O | C <sub>30</sub> H <sub>34</sub> BiI <sub>6</sub> N <sub>4</sub> O |
| Formula weight                              | 737.92                                                        | 925.88                                                        | 2026.67                                                                         | 1436.99                                                           |
| Temperature/K                               | 140                                                           | 140                                                           | 100(2)                                                                          | 100.15                                                            |
| Crystal system                              | monoclinic                                                    | monoclinic                                                    | triclinic                                                                       | triclinic                                                         |
| Space group                                 | P2 <sub>1</sub> /n                                            | P2 <sub>1</sub> /n                                            | P-1                                                                             | P-1                                                               |
| a/Å                                         | 11.442(3)                                                     | 11.7459(14)                                                   | 10.4022(5)                                                                      | 11.0547(5)                                                        |
| b/Å                                         | 13.461(3)                                                     | 14.2042(19)                                                   | 12.5641(7)                                                                      | 13.7612(6)                                                        |
| c/Å                                         | 12.460(3)                                                     | 12.5884(15)                                                   | 19.9063(10)                                                                     | 13.8907(6)                                                        |
| α/°                                         | 90                                                            | 90                                                            | 94.466(2)                                                                       | 74.6500(10)                                                       |
| β/°                                         | 107.555(7)                                                    | 106.018(4)                                                    | 103.2530(10)                                                                    | 87.7940(10)                                                       |
| γ/°                                         | 90                                                            | 90                                                            | 112.5700(10)                                                                    | 72.9350(10)                                                       |
| Volume/Å <sup>3</sup>                       | 1829.8(8)                                                     | 2018.7(4)                                                     | 2298.2(2)                                                                       | 1946.28(15)                                                       |
| Z                                           | 4                                                             | 4                                                             | 2                                                                               | 2                                                                 |
| ρ <sub>calc</sub> /cm <sup>3</sup>          | 2.679                                                         | 3.046                                                         | 2.929                                                                           | 2.452                                                             |
| μ/mm <sup>-1</sup>                          | 18.476                                                        | 14.948                                                        | 13.719                                                                          | 9.316                                                             |
| F(000)                                      | 1340                                                          | 1628                                                          | 1786                                                                            | 1302                                                              |
| Crystal size/mm <sup>3</sup>                | 0.12 × 0.07 × 0.05                                            | 0.08 × 0.07 × 0.01                                            | 0.2 × 0.16 × 0.12                                                               | 0.22 × 0.14 × 0.08                                                |
| Radiation                                   | MoKα (λ = 0.71073)                                            | MoKα (λ = 0.71073)                                            | MoKα (λ = 0.71073)                                                              | MoKα (λ = 0.71073)                                                |
| 2θ range for data collection/°              | 4.24 to 52.03                                                 | 4.2 to 52.034                                                 | 4.384 to 63.19                                                                  | 4.232 to 63.112                                                   |
| Index ranges                                | -14 ≤ h ≤ 14, -16 ≤ k ≤ 16, -15 ≤ l ≤ 15                      | -14 ≤ h ≤ 14, -17 ≤ k ≤ 17, -15 ≤ l ≤ 15                      | -15 ≤ h ≤ 15, -18 ≤ k ≤ 18, -29 ≤ l ≤ 28                                        | -16 ≤ h ≤ 16, -20 ≤ k ≤ 20, -20 ≤ l ≤ 20                          |
| Reflections collected                       | 18230                                                         | 20088                                                         | 53186                                                                           | 46406                                                             |
| Independent reflections                     | 3599 [R <sub>int</sub> = 0.0600, R <sub>sigma</sub> = 0.0633] | 3976 [R <sub>int</sub> = 0.0668, R <sub>sigma</sub> = 0.0581] | 15231 [R <sub>int</sub> = 0.0401, R <sub>sigma</sub> = 0.0375]                  | 12915 [R <sub>int</sub> = 0.0282, R <sub>sigma</sub> = 0.0261]    |
| Data/restraints/parameters                  | 3599/0/175                                                    | 3976/0/175                                                    | 15231/0/417                                                                     | 12915/0/396                                                       |
| Goodness-of-fit on F <sup>2</sup>           | 1.034                                                         | 1.026                                                         | 1.089                                                                           | 1.066                                                             |
| Final R indexes [I ≥ 2σ (I)]                | R <sub>1</sub> = 0.0323, wR <sub>2</sub> = 0.0752             | R <sub>1</sub> = 0.0303, wR <sub>2</sub> = 0.0680             | R <sub>1</sub> = 0.0258, wR <sub>2</sub> = 0.0576                               | R <sub>1</sub> = 0.0203, wR <sub>2</sub> = 0.0410                 |
| Final R indexes [all data]                  | R <sub>1</sub> = 0.0394, wR <sub>2</sub> = 0.0785             | R <sub>1</sub> = 0.0401, wR <sub>2</sub> = 0.0714             | R <sub>1</sub> = 0.0293, wR <sub>2</sub> = 0.0588                               | R <sub>1</sub> = 0.0229, wR <sub>2</sub> = 0.0417                 |
| Largest diff. peak/hole / e Å <sup>-3</sup> | 2.22/-0.90                                                    | 1.02/-1.47                                                    | 2.22/-1.86                                                                      | 1.46/-1.39                                                        |

| Identification code                            | <b>VIIa</b>                                                    | <b>VIII</b>                                                   | <b>X</b>                                                      |
|------------------------------------------------|----------------------------------------------------------------|---------------------------------------------------------------|---------------------------------------------------------------|
| Empirical formula                              | $C_{120}H_{136}Bi_4I_{24}N_{16}O_4$                            | $C_{45}H_{57}Bi_7N_7O_3$                                      | $C_{27}H_{28}BiBr_{4.11}Cl_{1.89}N_3$                         |
| Formula weight                                 | 5747.96                                                        | 1841.25                                                       | 998.93                                                        |
| Temperature/K                                  | 100.15                                                         | 150(2)                                                        | 100                                                           |
| Crystal system                                 | orthorhombic                                                   | monoclinic                                                    | triclinic                                                     |
| Space group                                    | Pca2 <sub>1</sub>                                              | C2/m                                                          | P-1                                                           |
| a/Å                                            | 22.399(2)                                                      | 17.3495(14)                                                   | 9.4546(10)                                                    |
| b/Å                                            | 21.812(2)                                                      | 14.7084(12)                                                   | 13.2860(12)                                                   |
| c/Å                                            | 32.531(3)                                                      | 13.8354(11)                                                   | 13.9063(11)                                                   |
| $\alpha/^\circ$                                | 90                                                             | 90                                                            | 81.087(3)                                                     |
| $\beta/^\circ$                                 | 90                                                             | 121.690(2)                                                    | 76.125(4)                                                     |
| $\gamma/^\circ$                                | 90                                                             | 90                                                            | 69.233(4)                                                     |
| Volume/Å <sup>3</sup>                          | 15894(3)                                                       | 3004.2(4)                                                     | 1581.0(3)                                                     |
| Z                                              | 4                                                              | 2                                                             | 2                                                             |
| $\rho_{\text{calc}}/\text{cm}^3$               | 2.402                                                          | 2.035                                                         | 2.098                                                         |
| $\mu/\text{mm}^{-1}$                           | 9.126                                                          | 6.571                                                         | 10.951                                                        |
| F(000)                                         | 10416                                                          | 1708                                                          | 940                                                           |
| Crystal size/mm <sup>3</sup>                   | 0.26 × 0.2 × 0.04                                              | 0.12 × 0.1 × 0.06                                             | 0.2 × 0.17 × 0.15                                             |
| Radiation                                      | MoK $\alpha$ ( $\lambda = 0.71073$ )                           | MoK $\alpha$ ( $\lambda = 0.71073$ )                          | MoK $\alpha$ ( $\lambda = 0.71073$ )                          |
| 2 $\Theta$ range for data collection/ $^\circ$ | 2.892 to 52.044                                                | 4.73 to 54.202                                                | 3.288 to 61.194                                               |
| Index ranges                                   | -27 ≤ h ≤ 27, -26 ≤ k ≤ 26, -40 ≤ l ≤ 40                       | -22 ≤ h ≤ 22, -18 ≤ k ≤ 18, -17 ≤ l ≤ 17                      | -13 ≤ h ≤ 13, -18 ≤ k ≤ 18, -19 ≤ l ≤ 19                      |
| Reflections collected                          | 216605                                                         | 20006                                                         | 62971                                                         |
| Independent reflections                        | 31241 [R <sub>int</sub> = 0.0624, R <sub>sigma</sub> = 0.0438] | 3441 [R <sub>int</sub> = 0.0232, R <sub>sigma</sub> = 0.0147] | 9451 [R <sub>int</sub> = 0.0816, R <sub>sigma</sub> = 0.0653] |
| Data/restraints/parameters                     | 31241/313/756                                                  | 3441/18/142                                                   | 9451/0/361                                                    |
| Goodness-of-fit on F <sup>2</sup>              | 1.161                                                          | 1.046                                                         | 1.04                                                          |
| Final R indexes [I >= 2 $\sigma$ (I)]          | R <sub>1</sub> = 0.0751, wR <sub>2</sub> = 0.1617              | R <sub>1</sub> = 0.0417, wR <sub>2</sub> = 0.1186             | R <sub>1</sub> = 0.0384, wR <sub>2</sub> = 0.0546             |
| Final R indexes [all data]                     | R <sub>1</sub> = 0.0934, wR <sub>2</sub> = 0.1753              | R <sub>1</sub> = 0.0440, wR <sub>2</sub> = 0.1213             | R <sub>1</sub> = 0.0698, wR <sub>2</sub> = 0.0633             |
| Largest diff. peak/hole / e Å <sup>-3</sup>    | 2.58/-5.85                                                     | 1.43/-0.71                                                    | 1.56/-1.00                                                    |

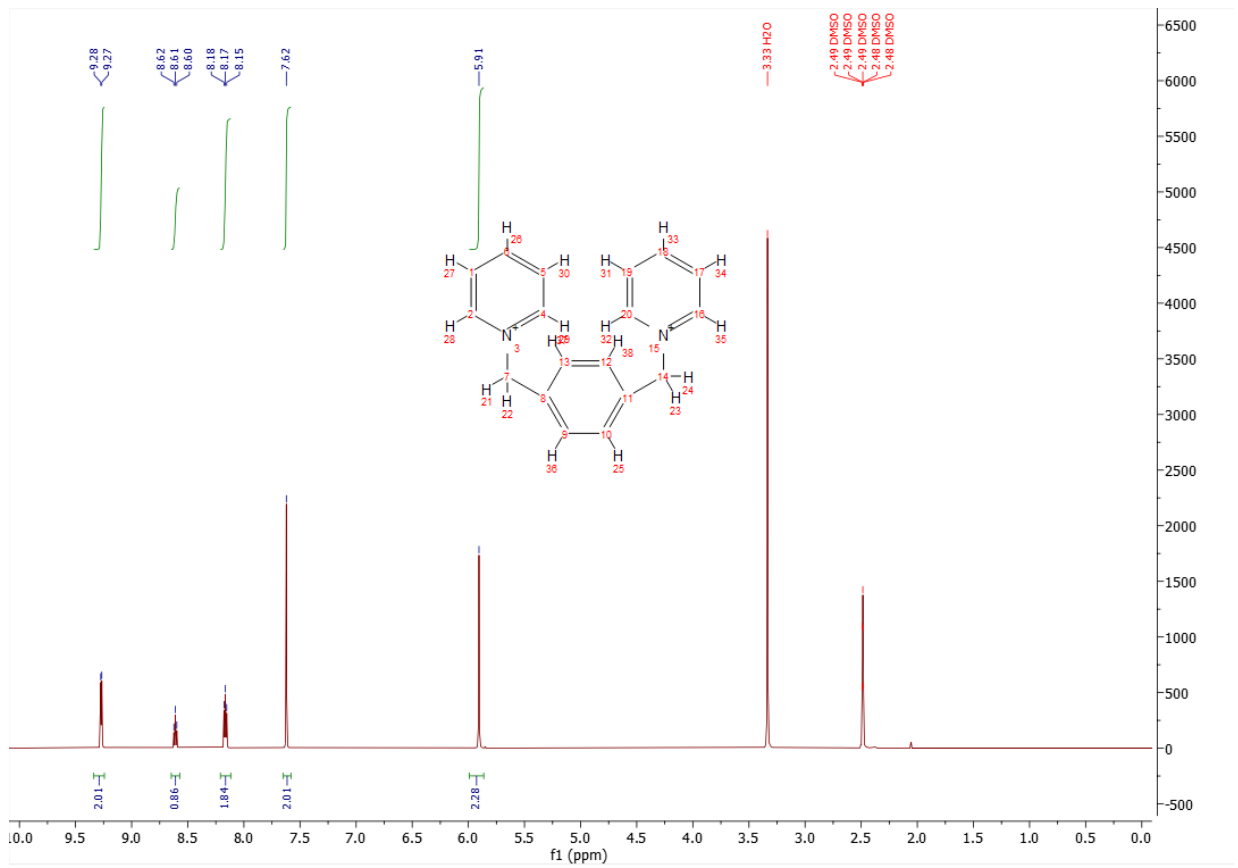

a

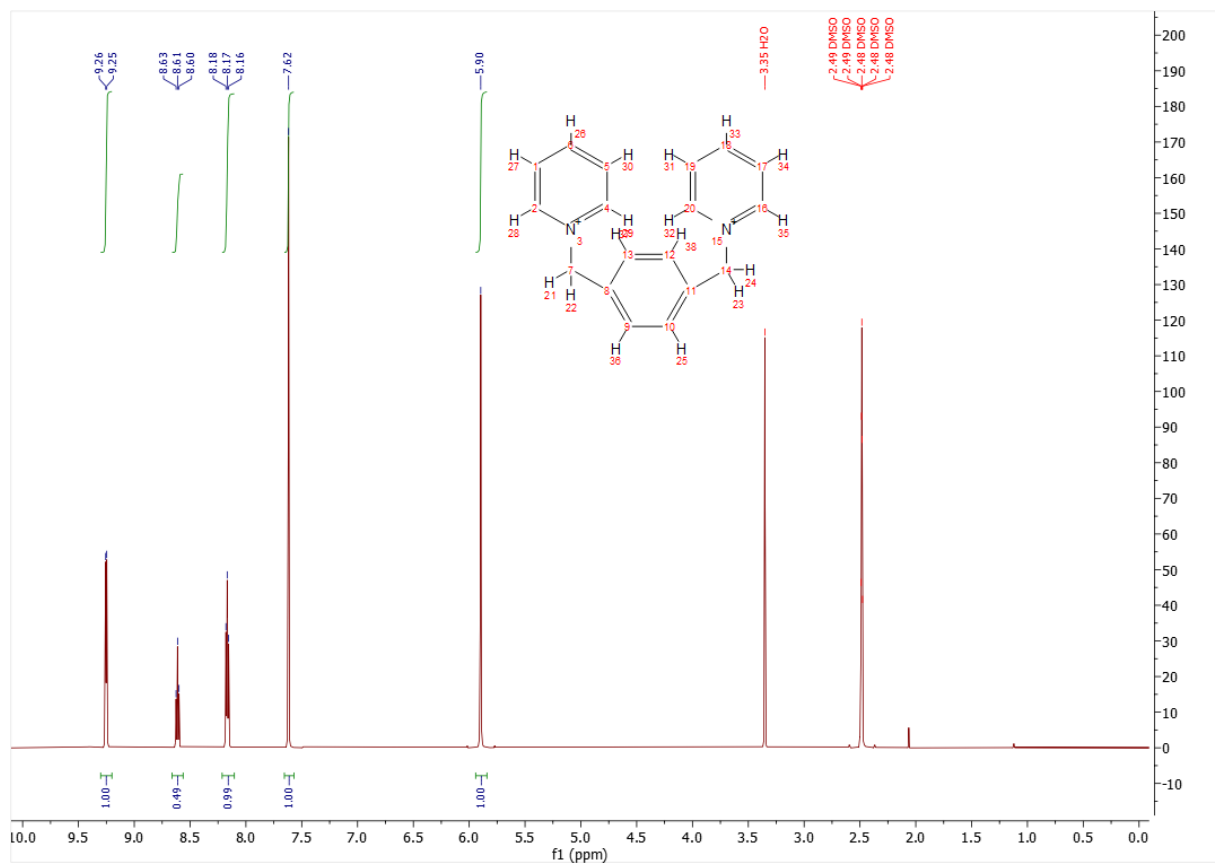

b

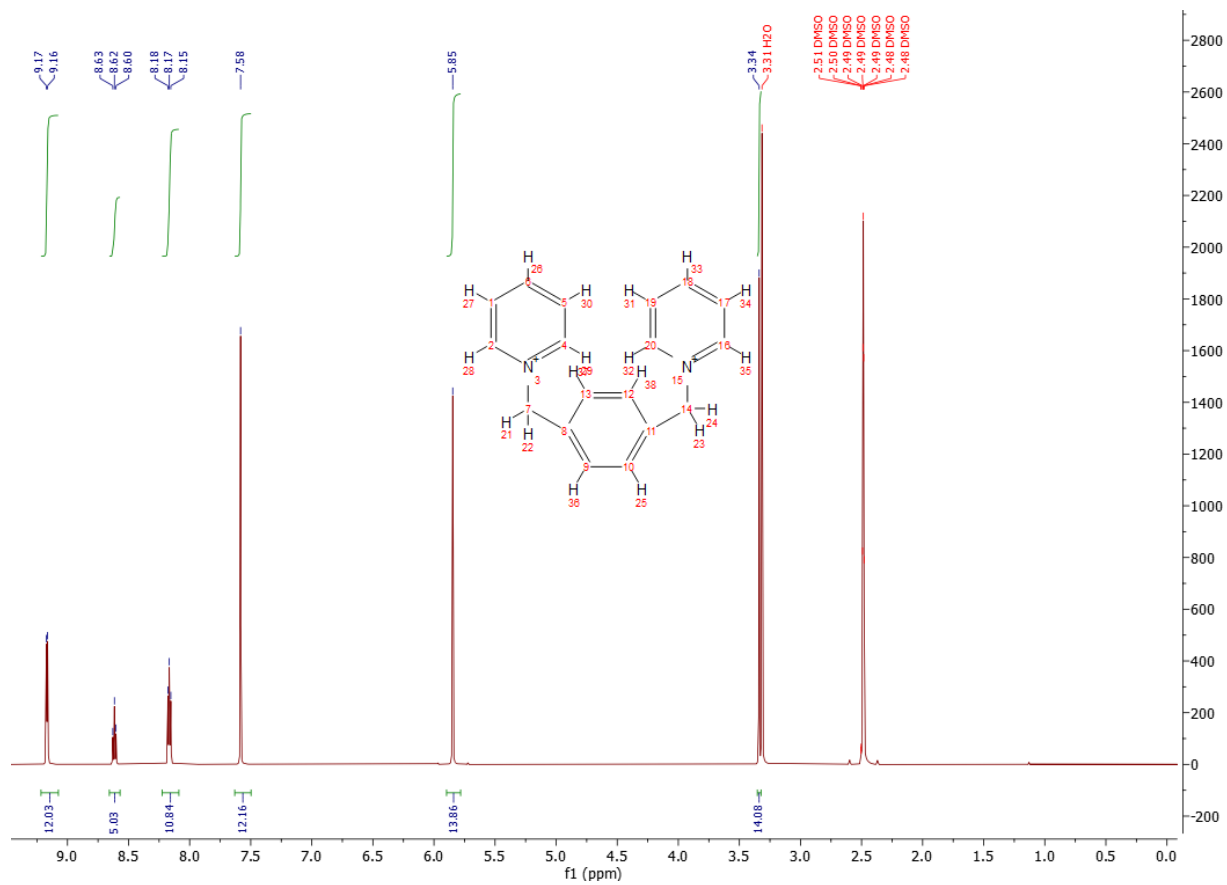

c

**Fig. S1.**  $^1\text{H}$  NMR spectra of  $[\text{Py}_2(\text{XK})]\text{Cl}_2$  (a),  $[\text{Py}_2(\text{XK})]\text{Br}_2$  (b),  $[\text{Py}_2(\text{XK})]\text{I}_2$  (c).

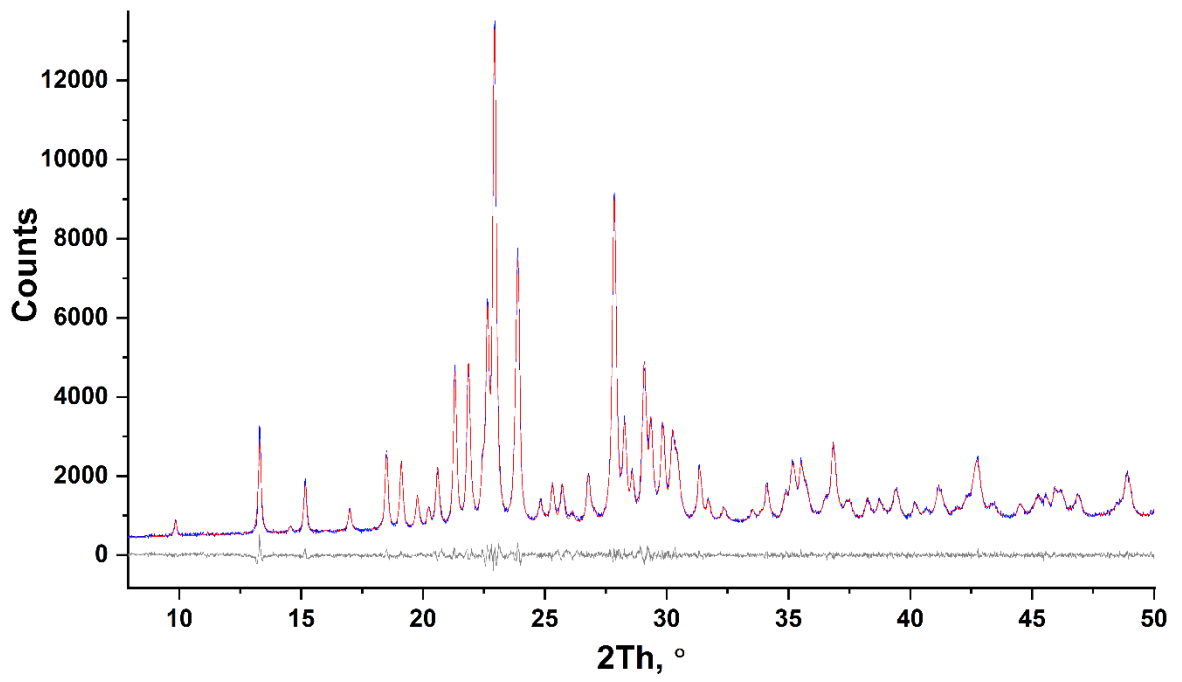

a ( $[\text{Py}_2(\text{XK})]\text{Br}_2$ )

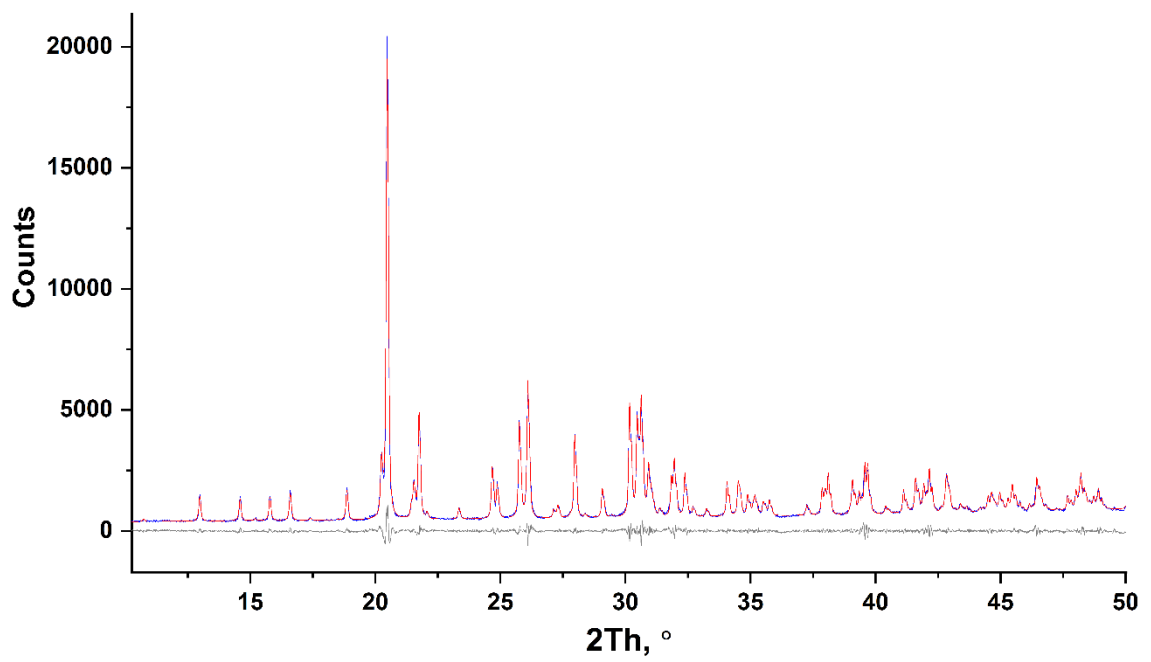

b ( $[\text{Py}_2(\text{XK})]\text{I}_2$ )



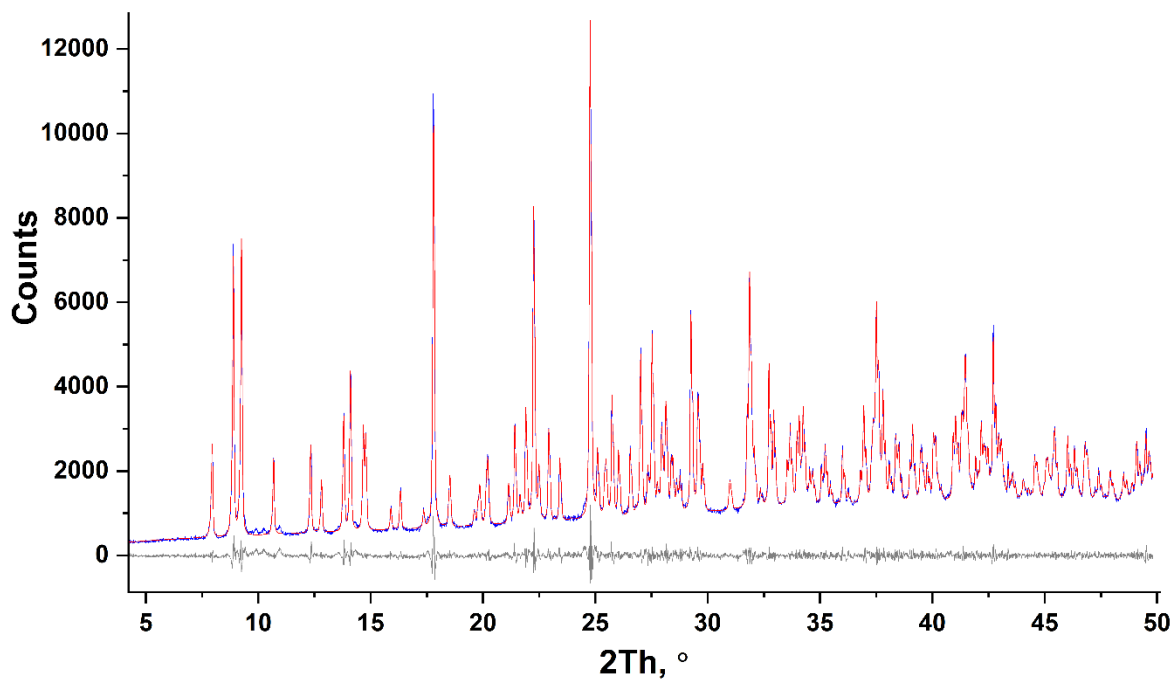

c (I)

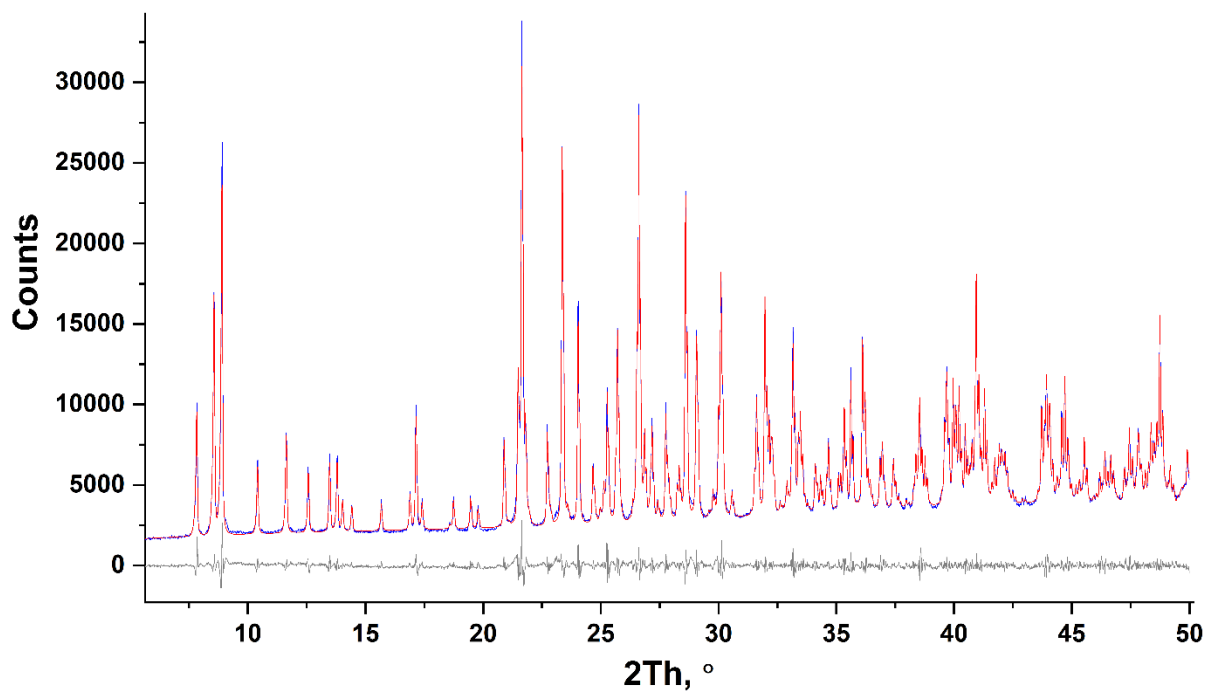

d (II)

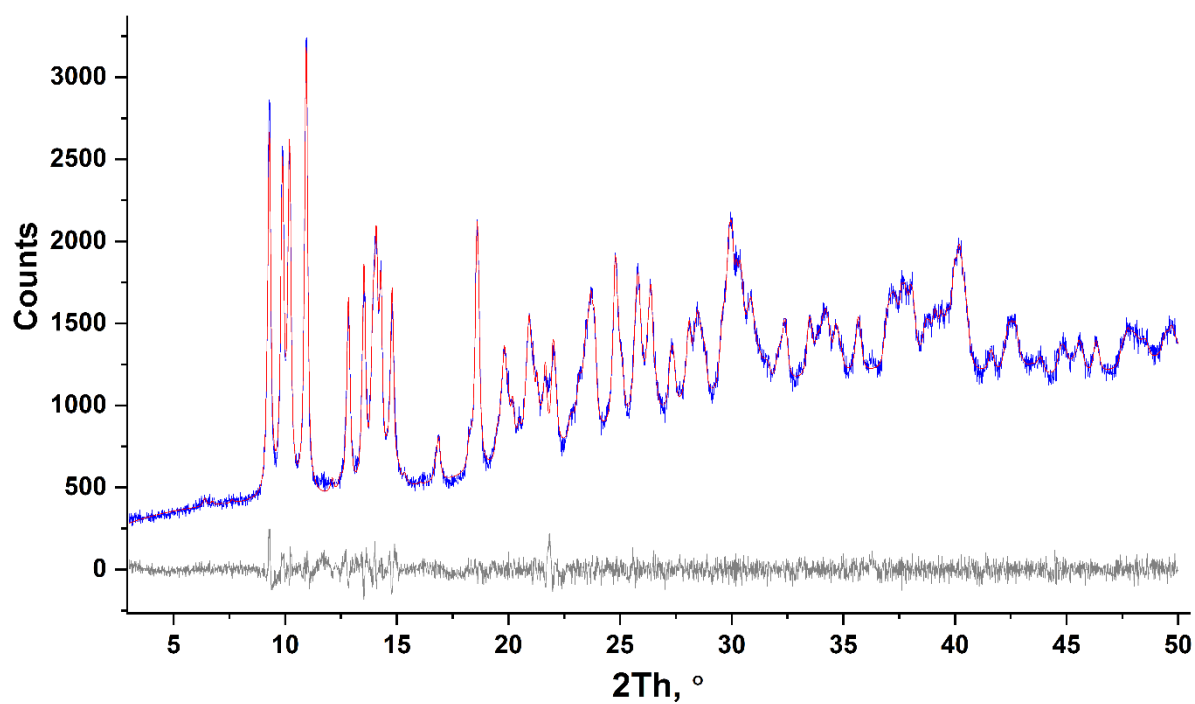

e (III)

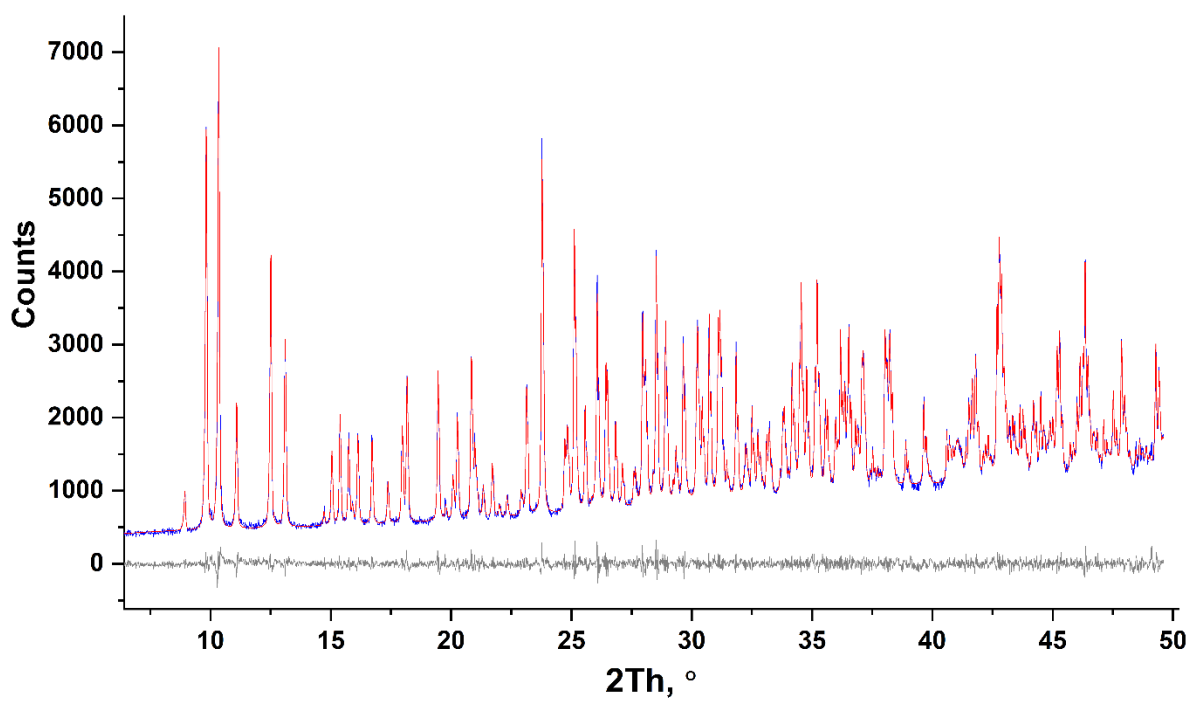

f (IV)

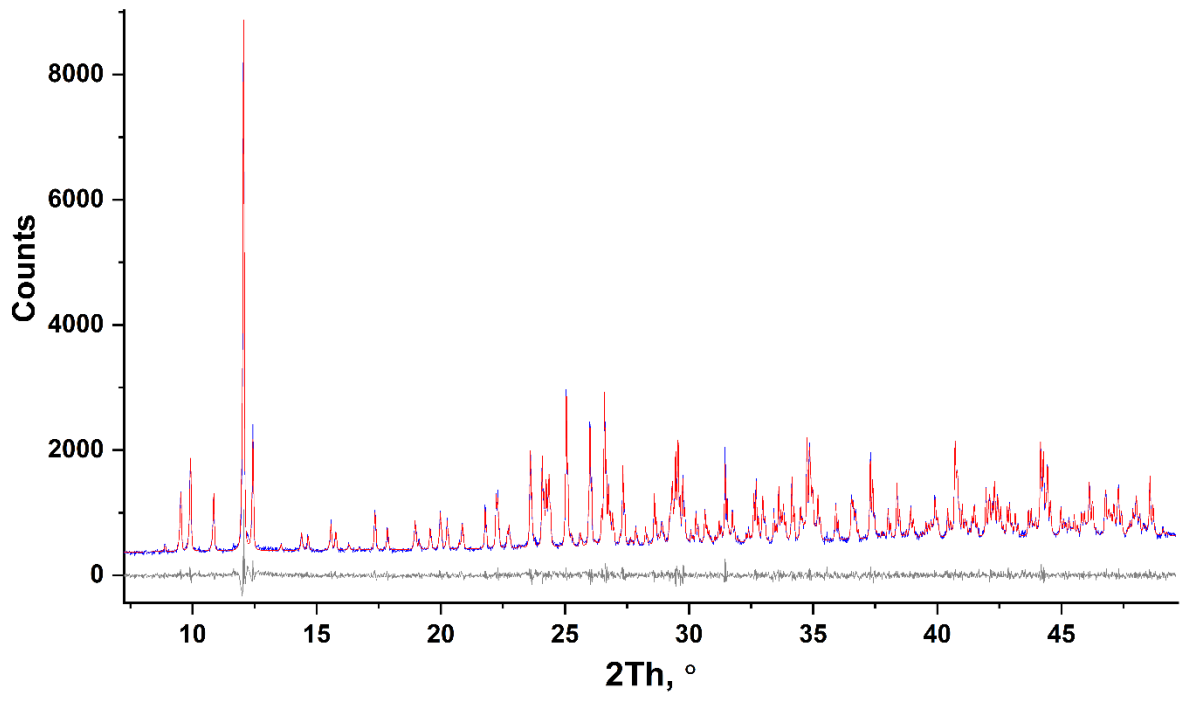

g (V)

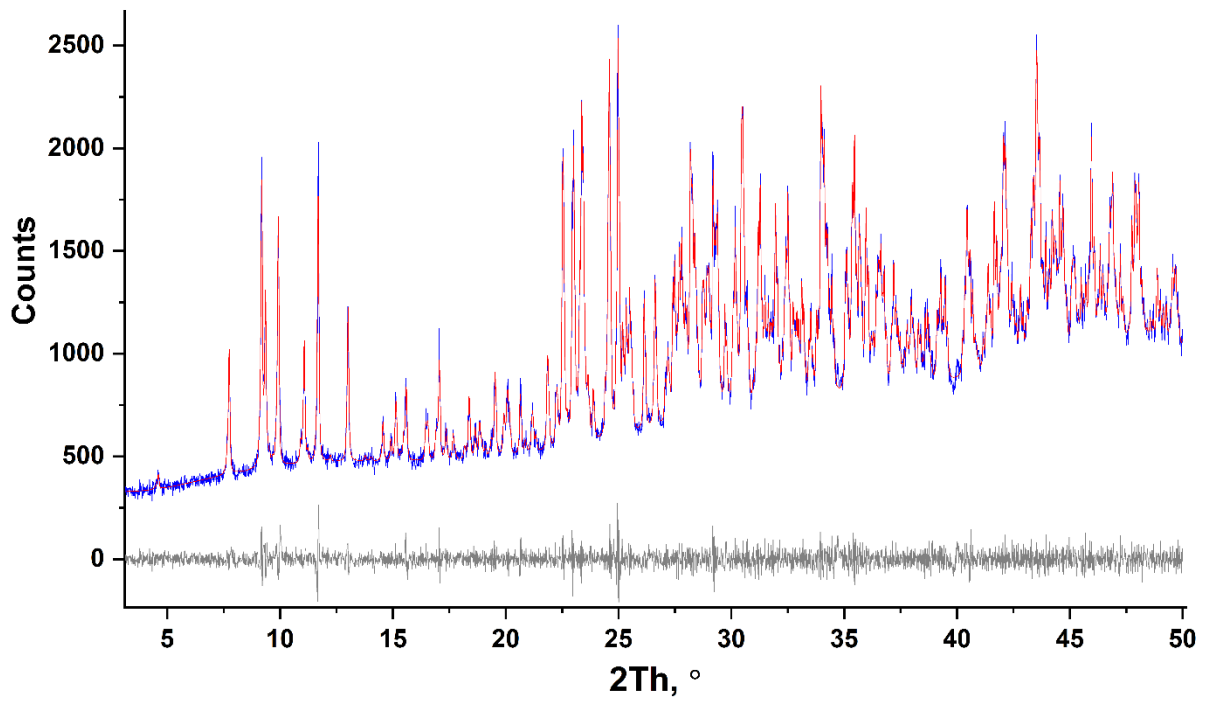

h (VI)

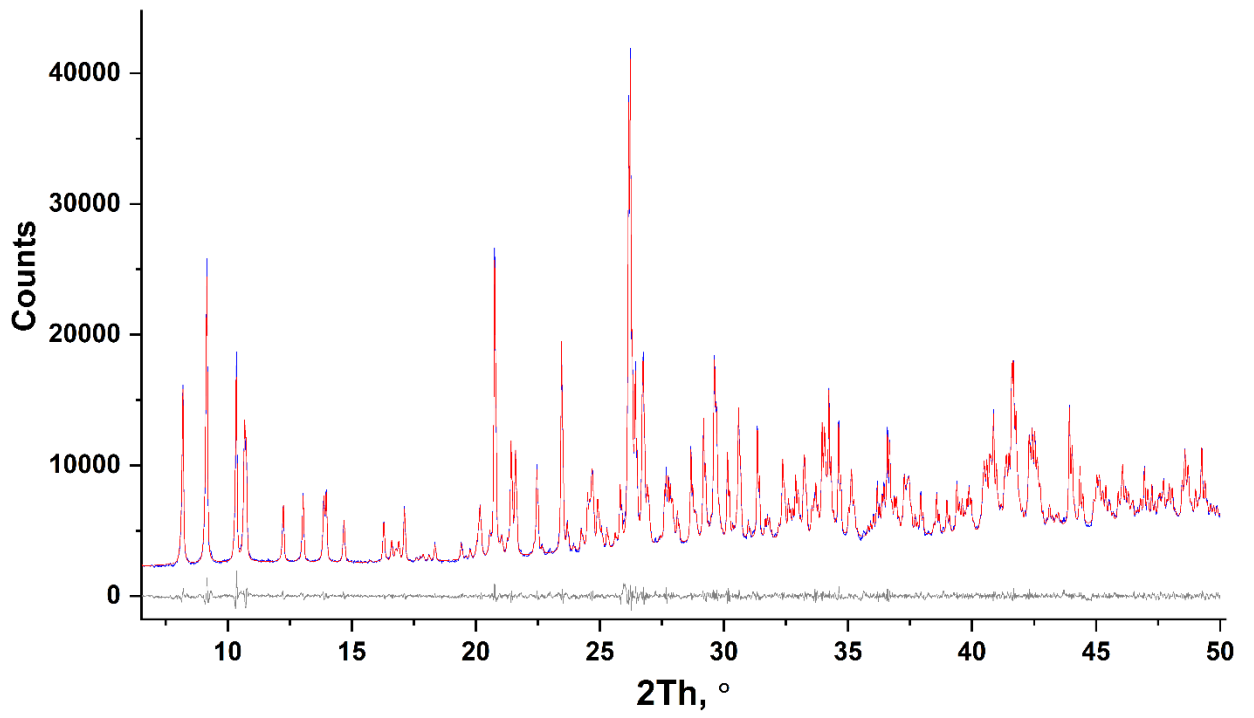

i (VII)

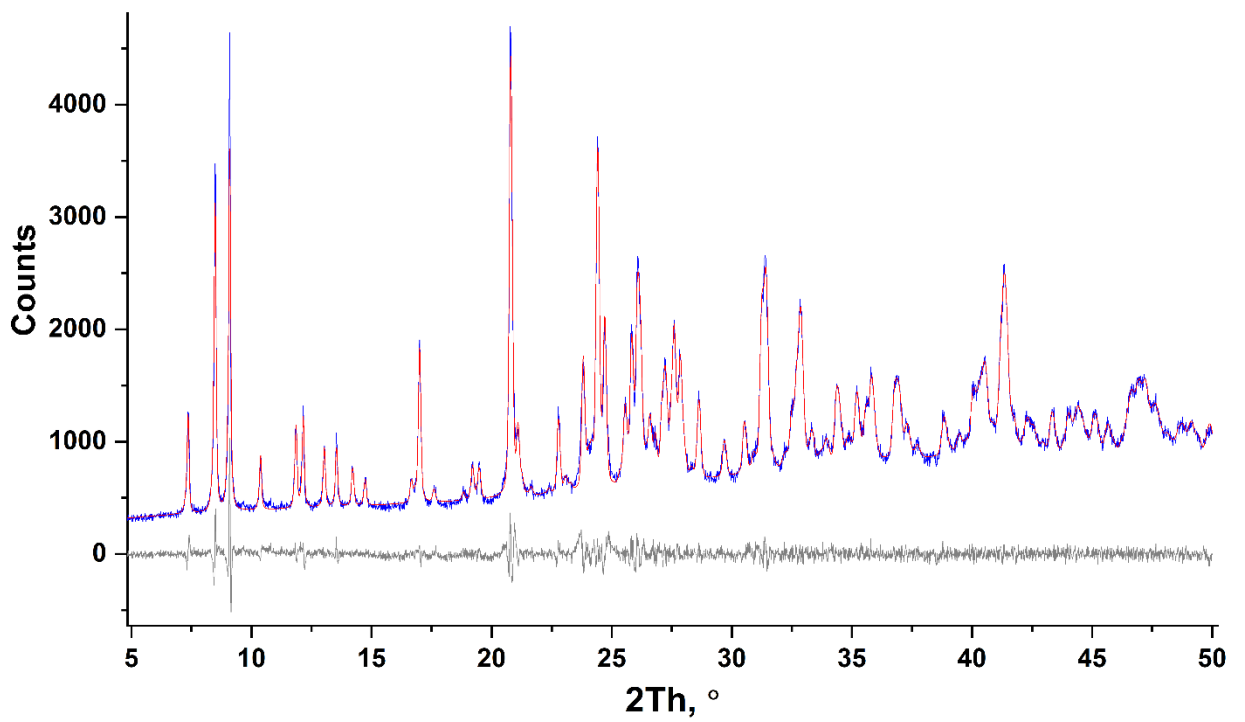

j (VIII)

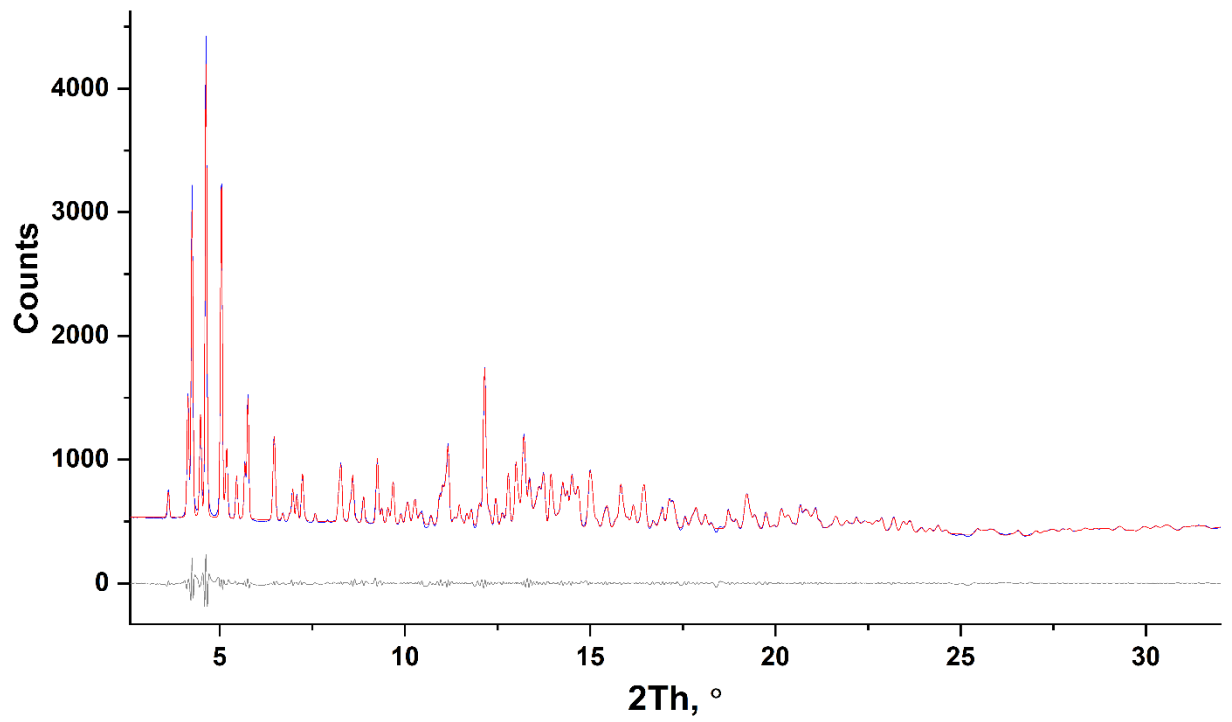

k (IX)

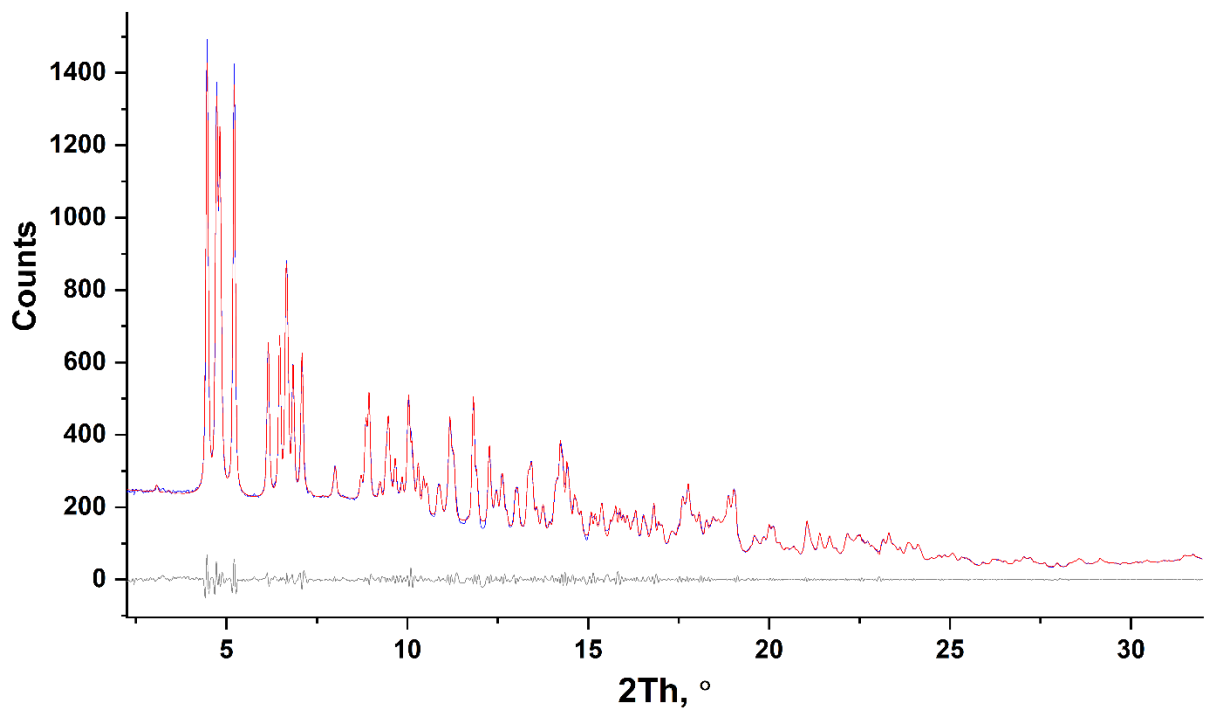

l (X)

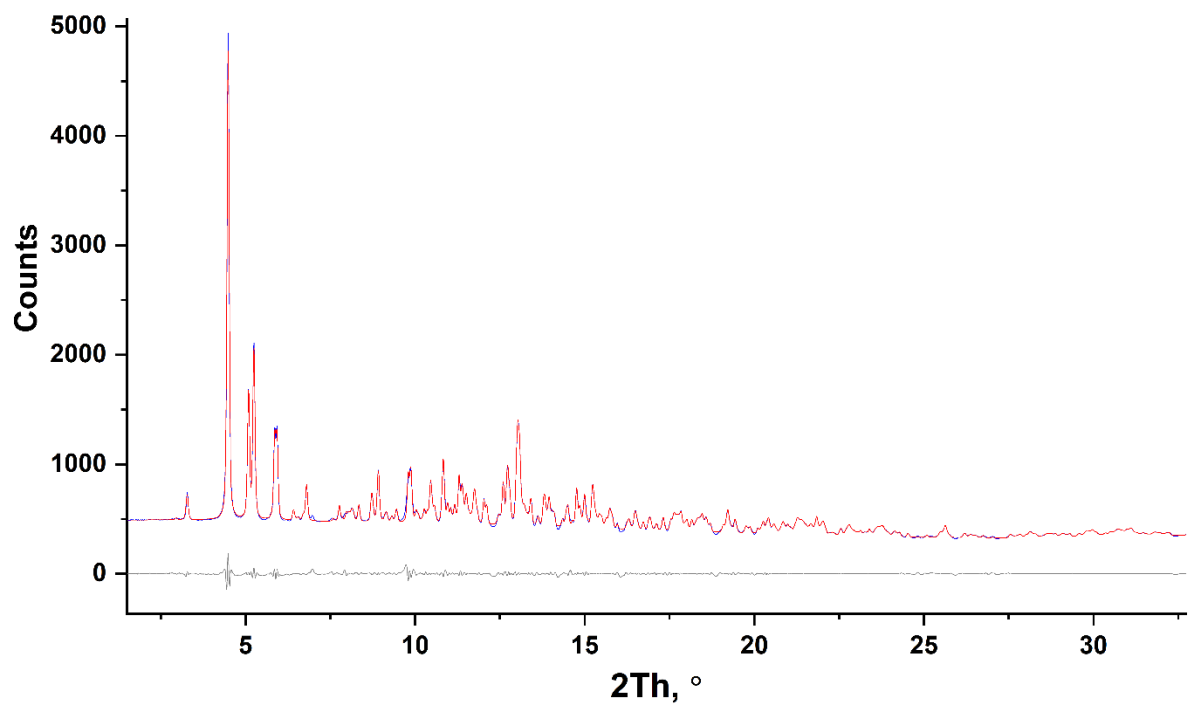

m (XI)

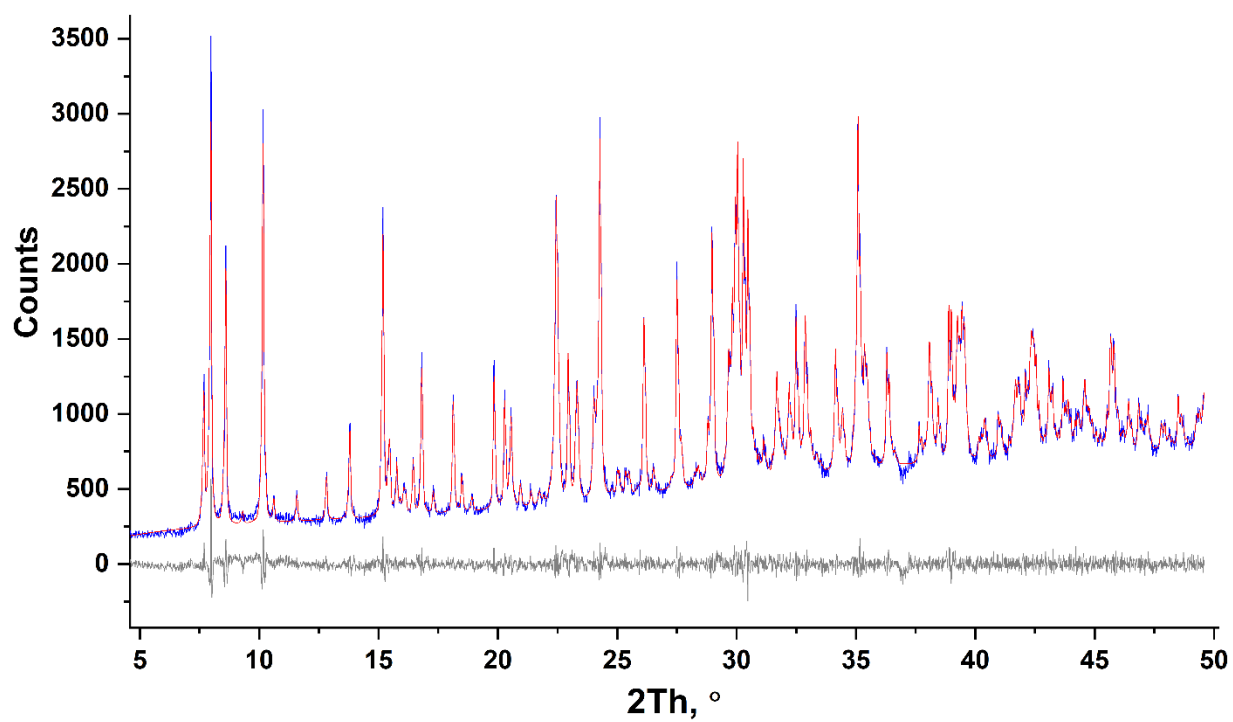

n (XII)

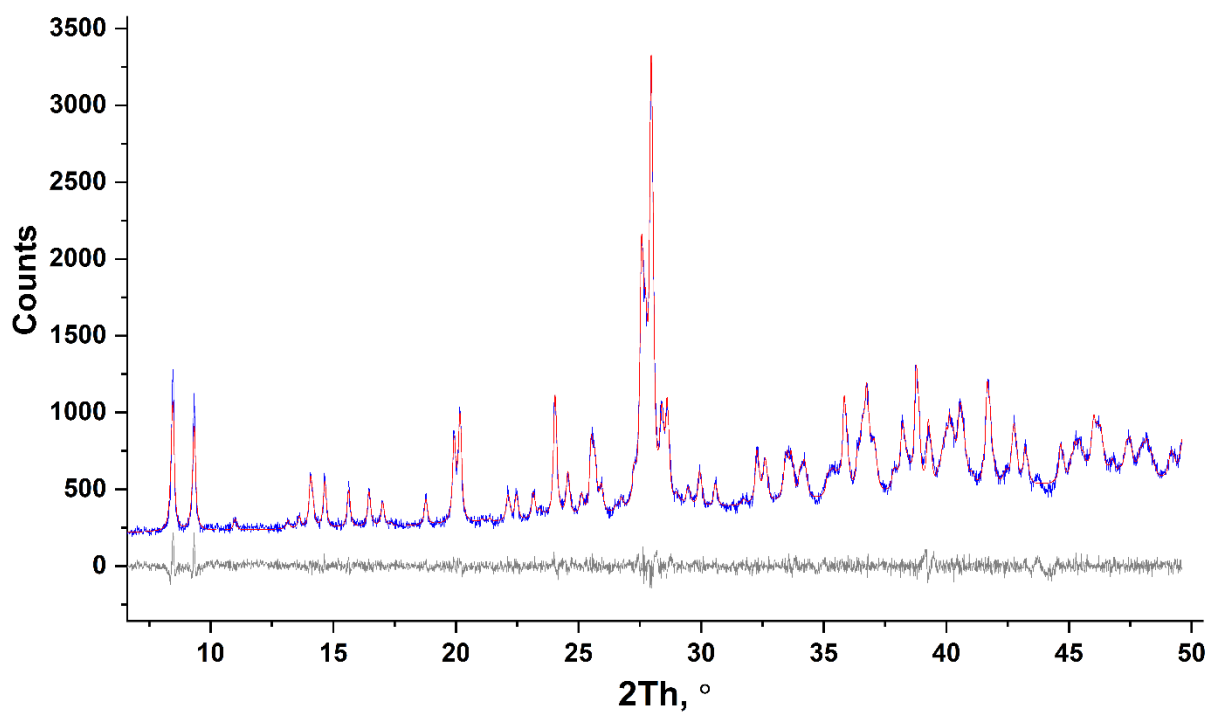

o (**XIII**, isolated from DMSO solution)

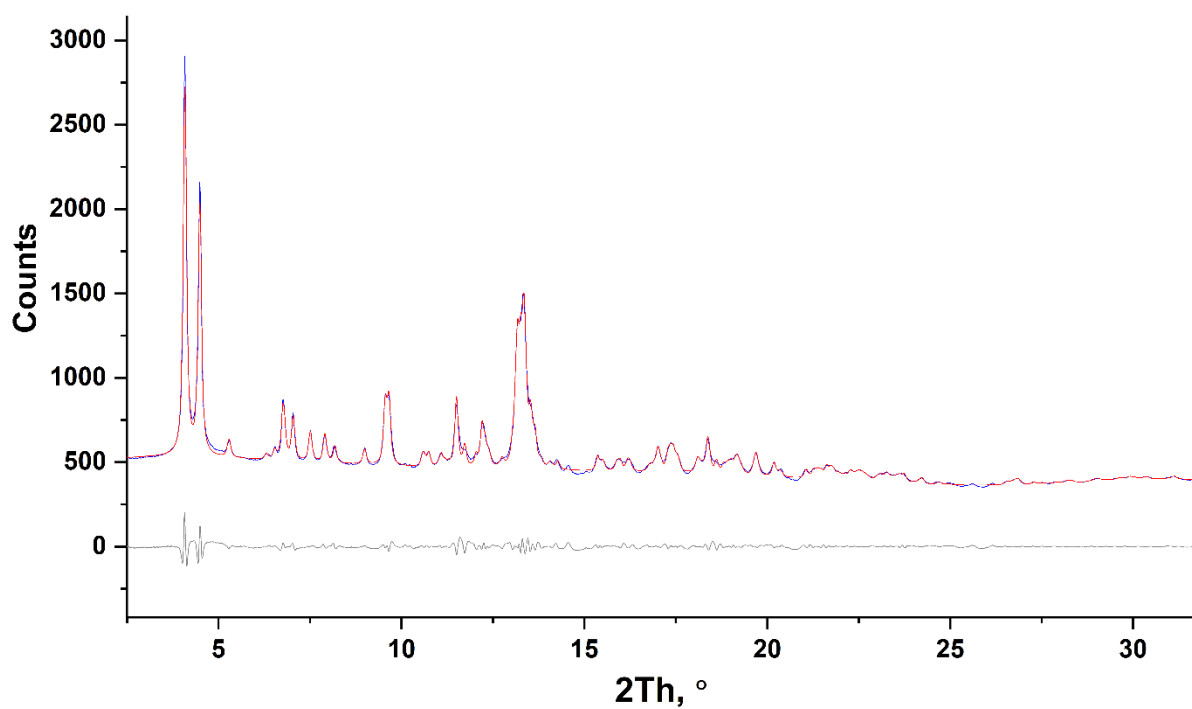

p (**XIII**, isolated from H<sub>2</sub>O solution)

**Fig. S2.** Pawley refinement profiles for [Py<sub>2</sub>(XK)]Br<sub>2</sub> (a), [Py<sub>2</sub>(XK)]I<sub>2</sub> (b), **I-XIII** (c-p) recorded at RT. Red and blue lines correspond to the calculated profile and experimental pattern respectively. The bottom trace shows the difference curve.

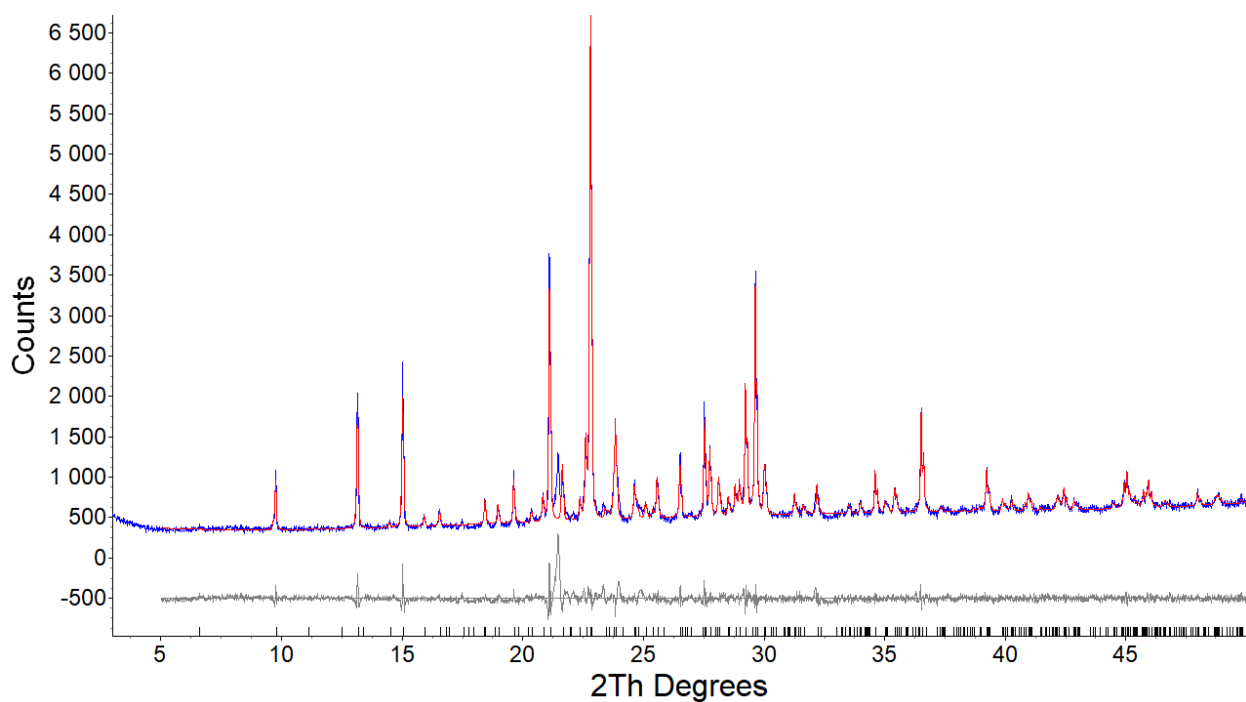

a

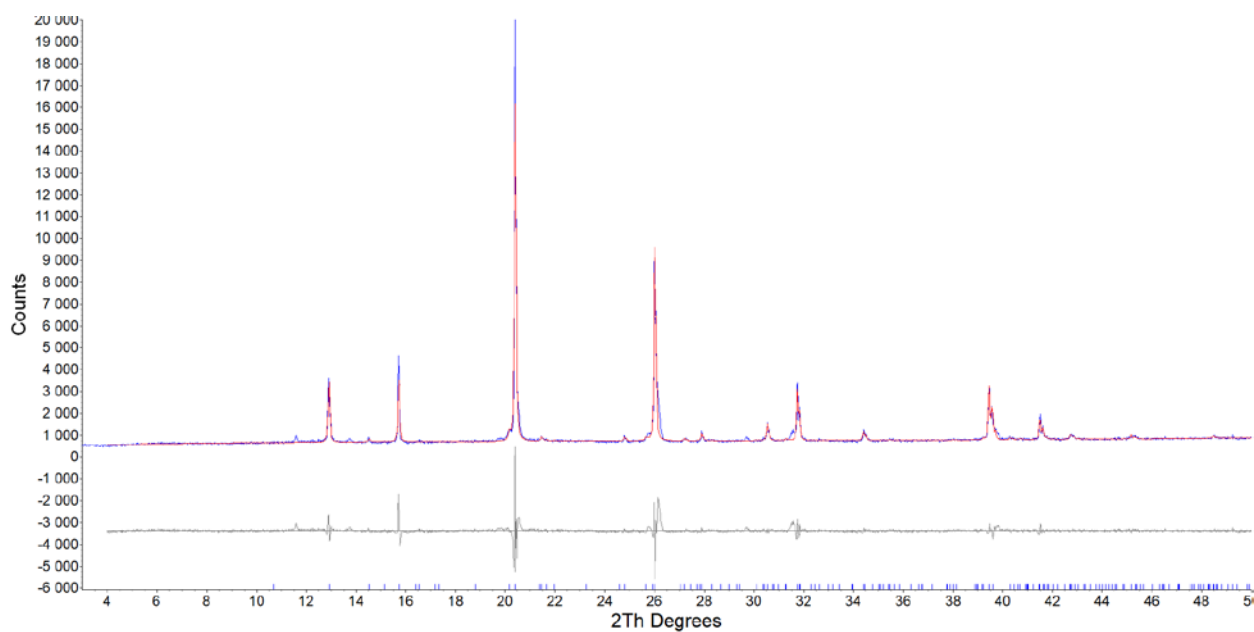

b

**Fig. S3.** Pawley refinement profiles for extracted [Py<sub>2</sub>(XK)]Br<sub>2</sub> from decomposed product of **I** (a) and extracted [Py<sub>2</sub>(XK)]I<sub>2</sub> from decomposed product of **II** (b) recorded at RT. Red and blue lines correspond to the calculated profile and experimental pattern respectively. The bottom trace shows the difference curve.



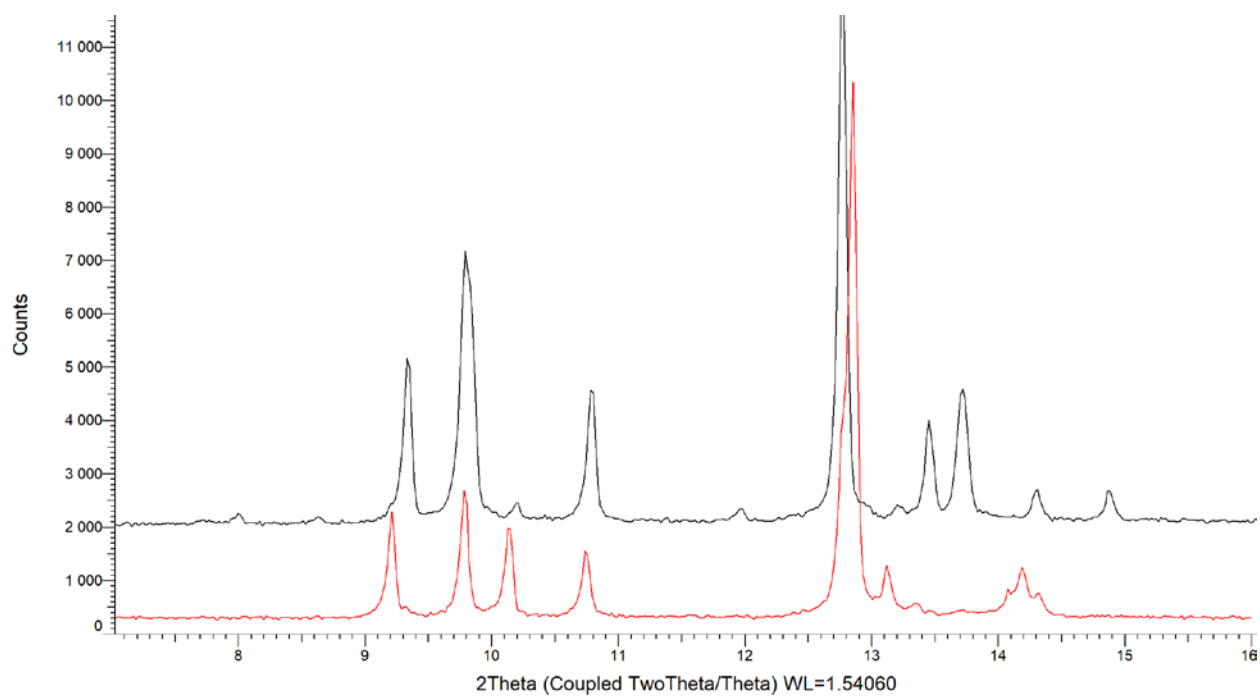

**Fig. S4.** PXRd profiles for compound  $[Py_2(XK)]_3[BiBr_{6-x}Cl_x]_2$  (**III**) before (black line) and after (red line, **III**  $\rightarrow$  **X**) UV irradiation.

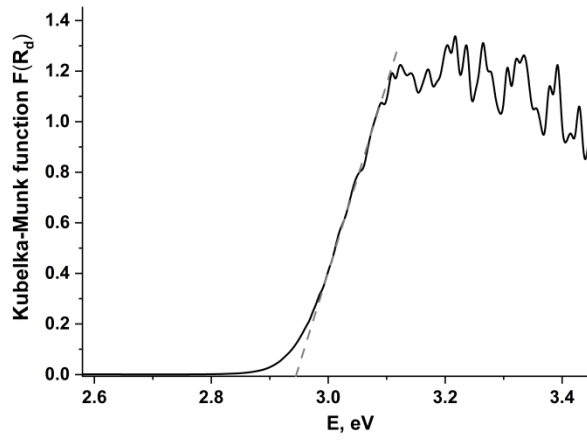

a (I)

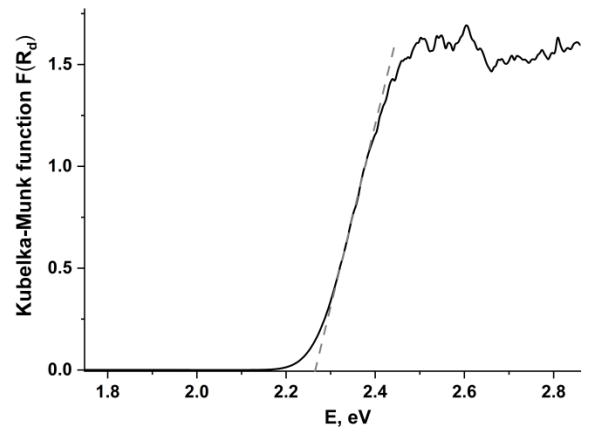

b (II)

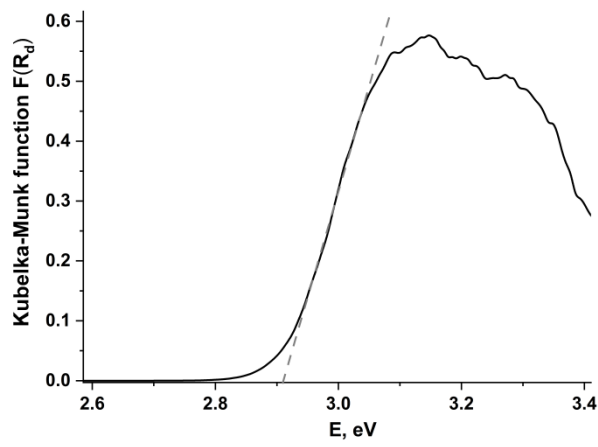

c (III)

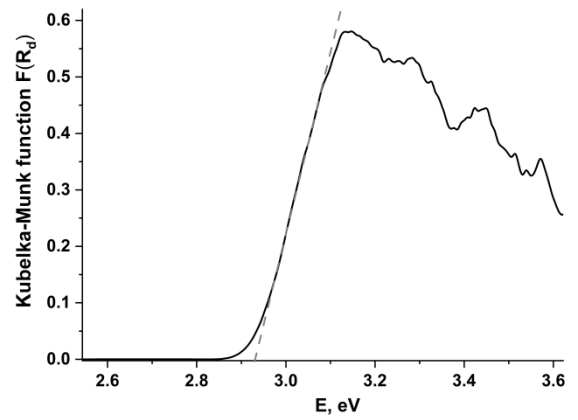

d (IV)

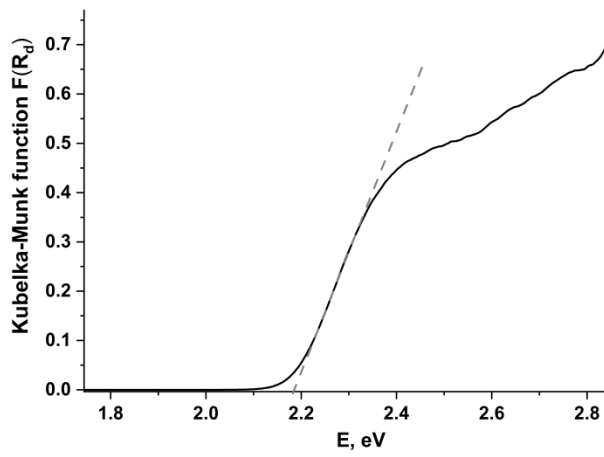

e (V)

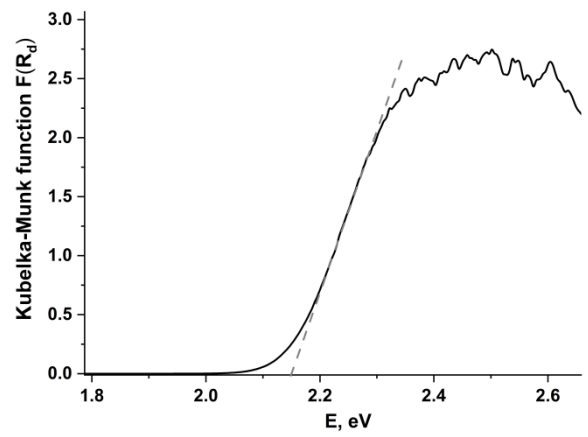

f (VI)

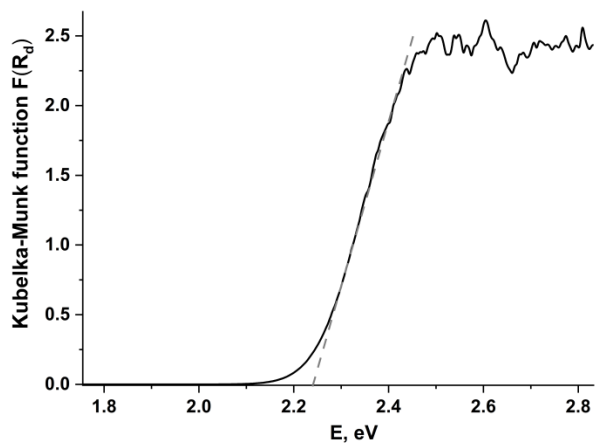

g (VII)

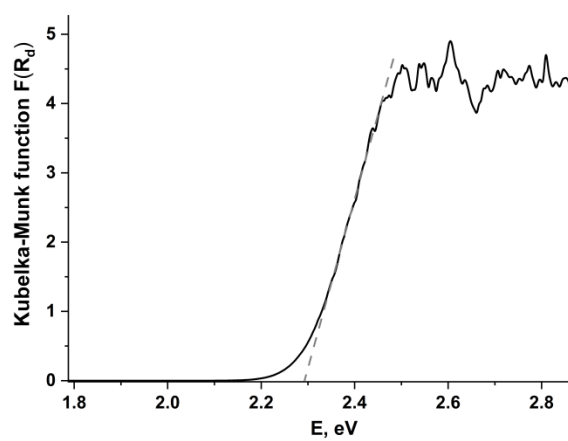

h (VIII)

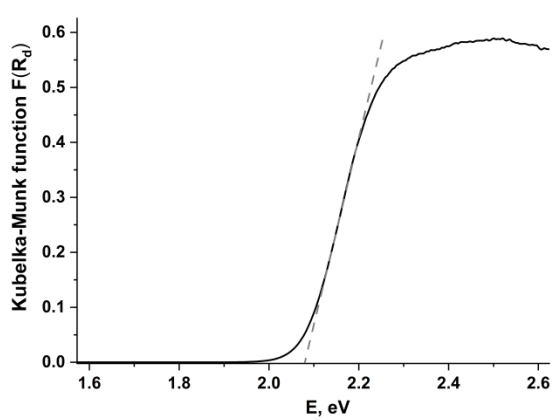

i (IX)

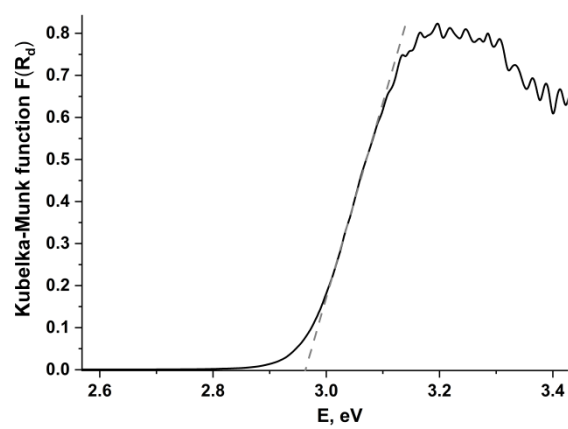

j (X)

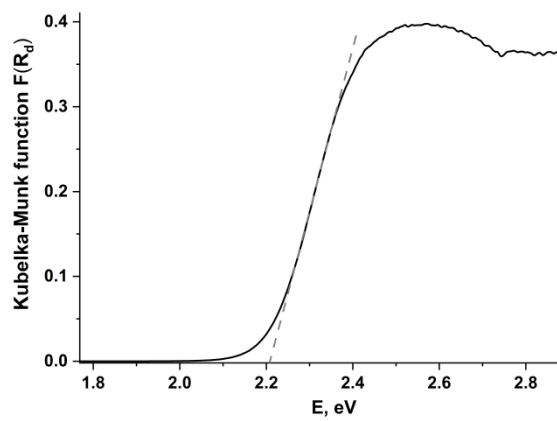

k (XI)

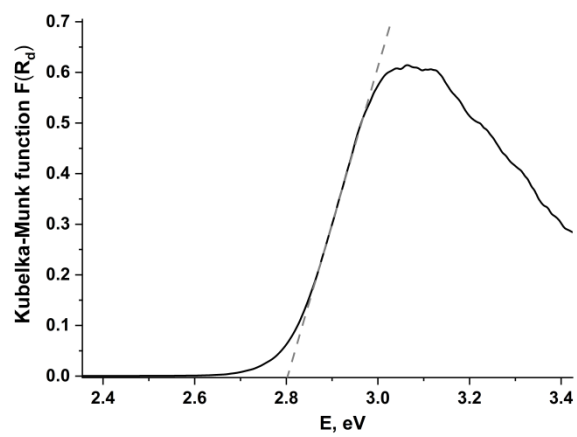

l (XII)

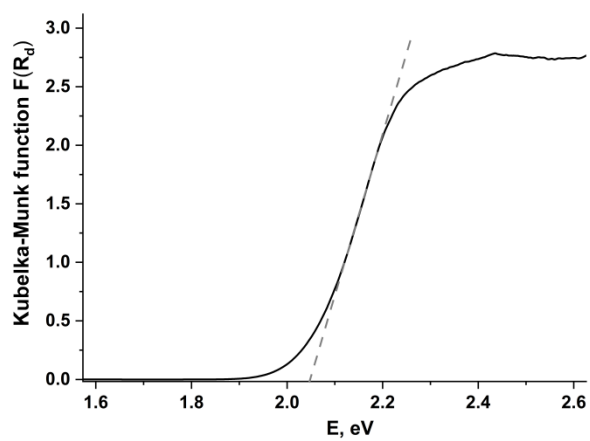

m (XIII)

**Fig. S5.** The reflectance spectra of **I-XIII** (a-m). The linear part of the plot is extrapolated to the x-axis to determine  $E_g$  values.

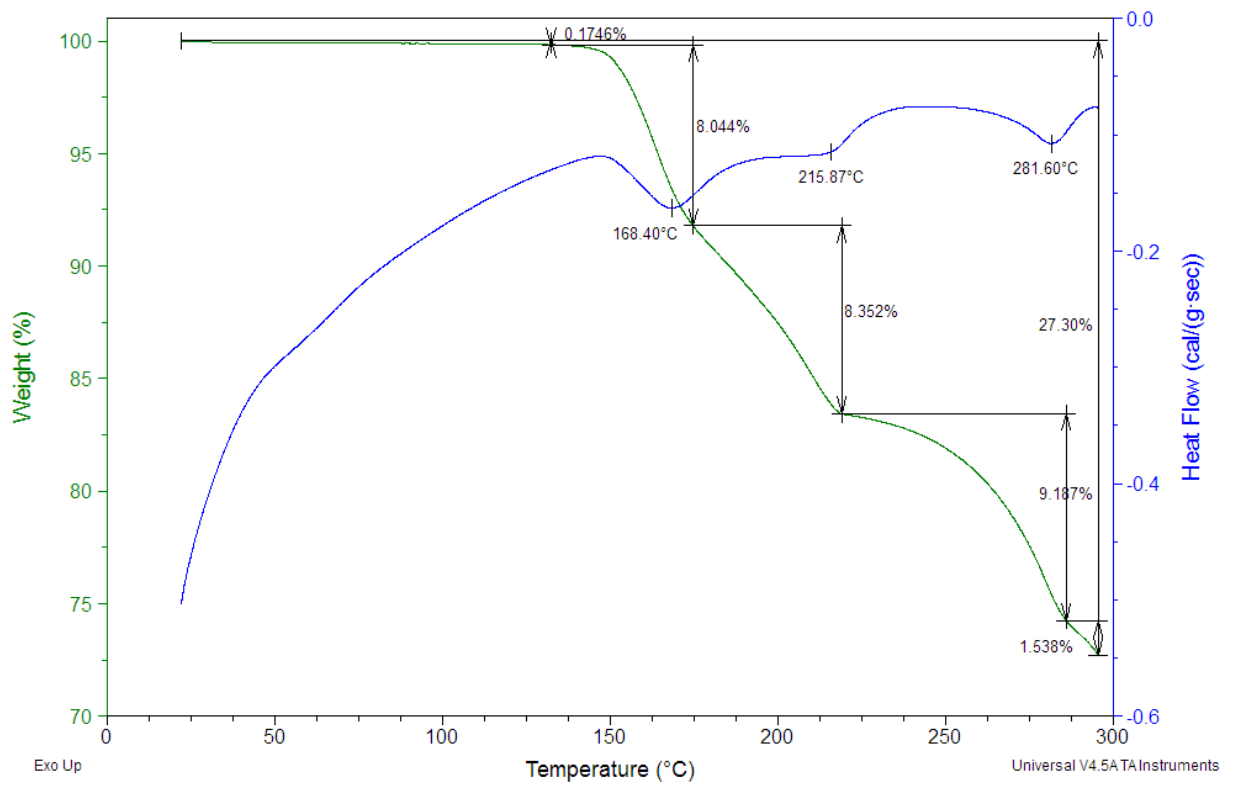

a (I)

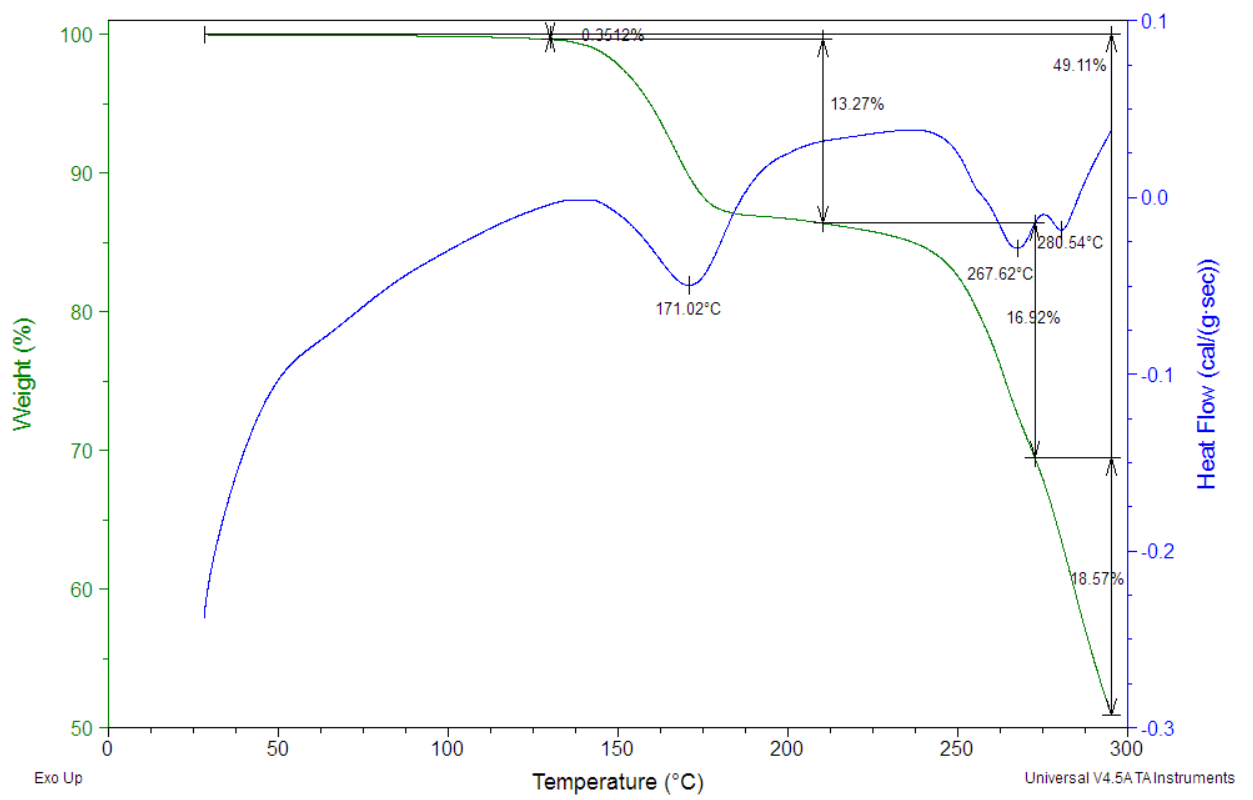

b (II)

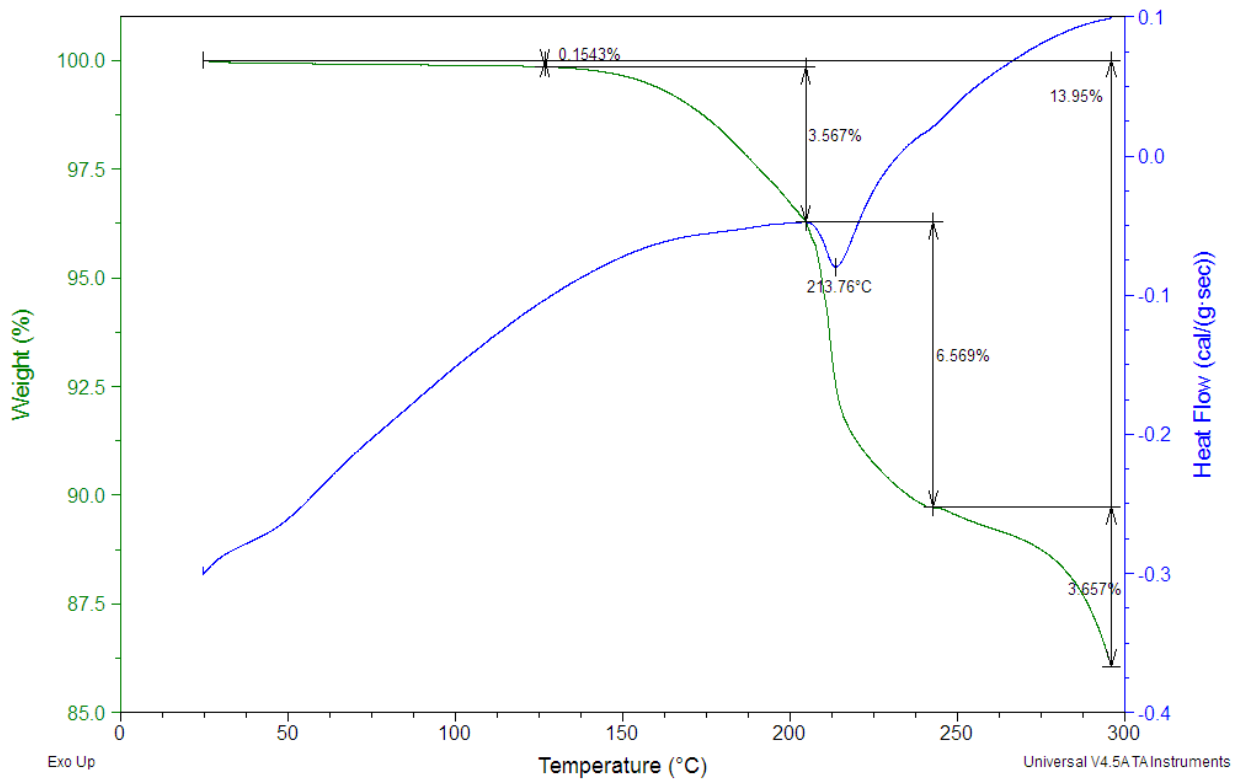

c (IV)

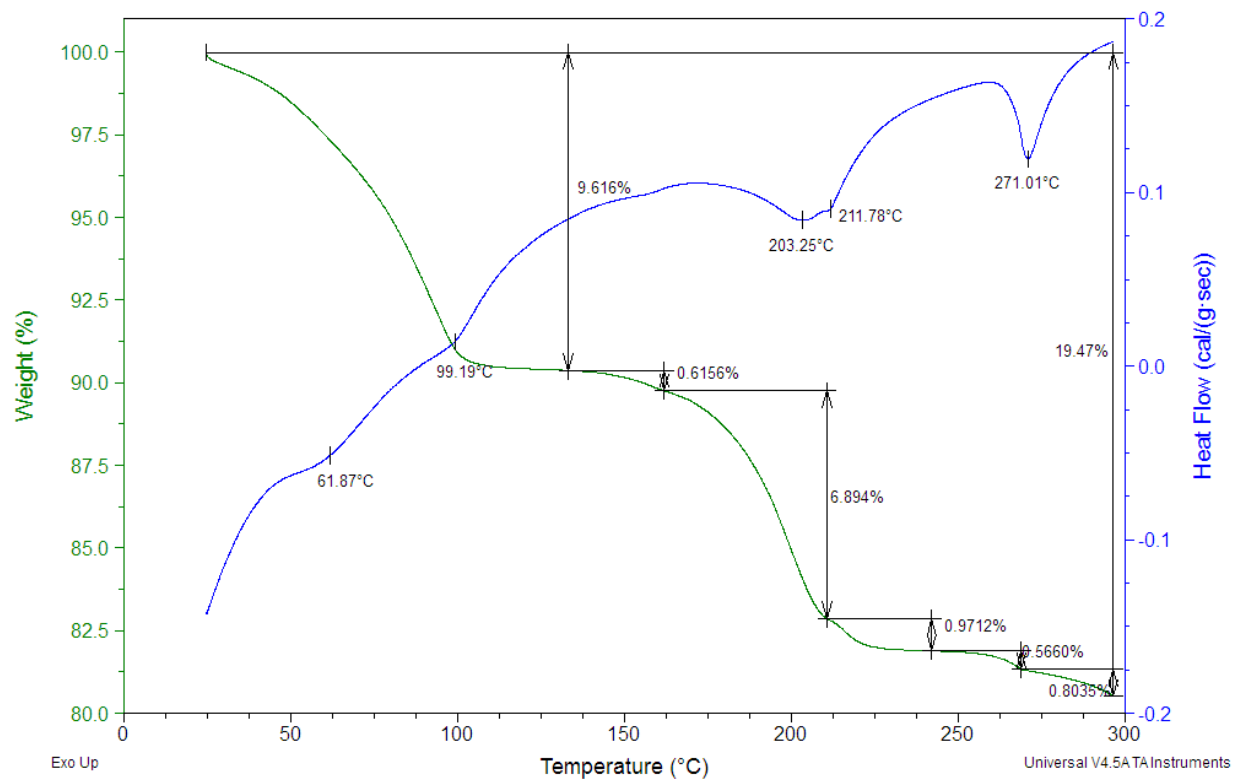

d (V)

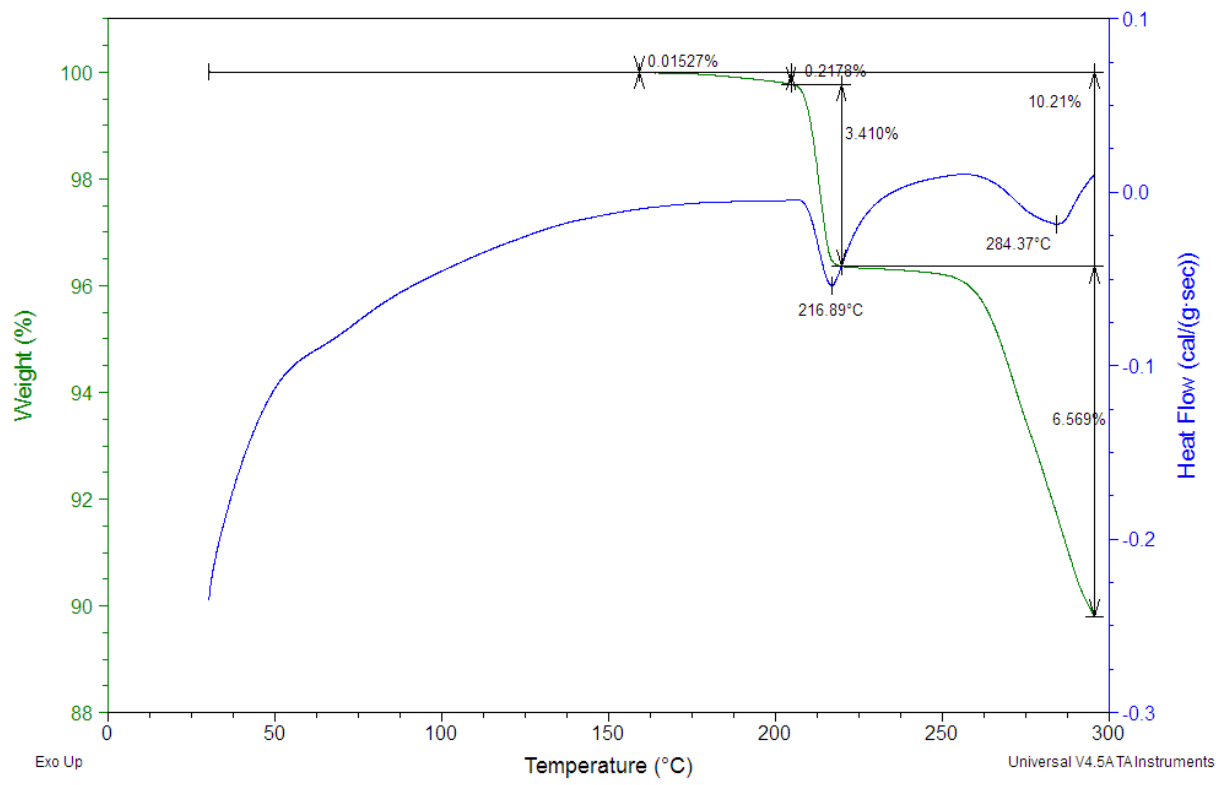

e (VI)

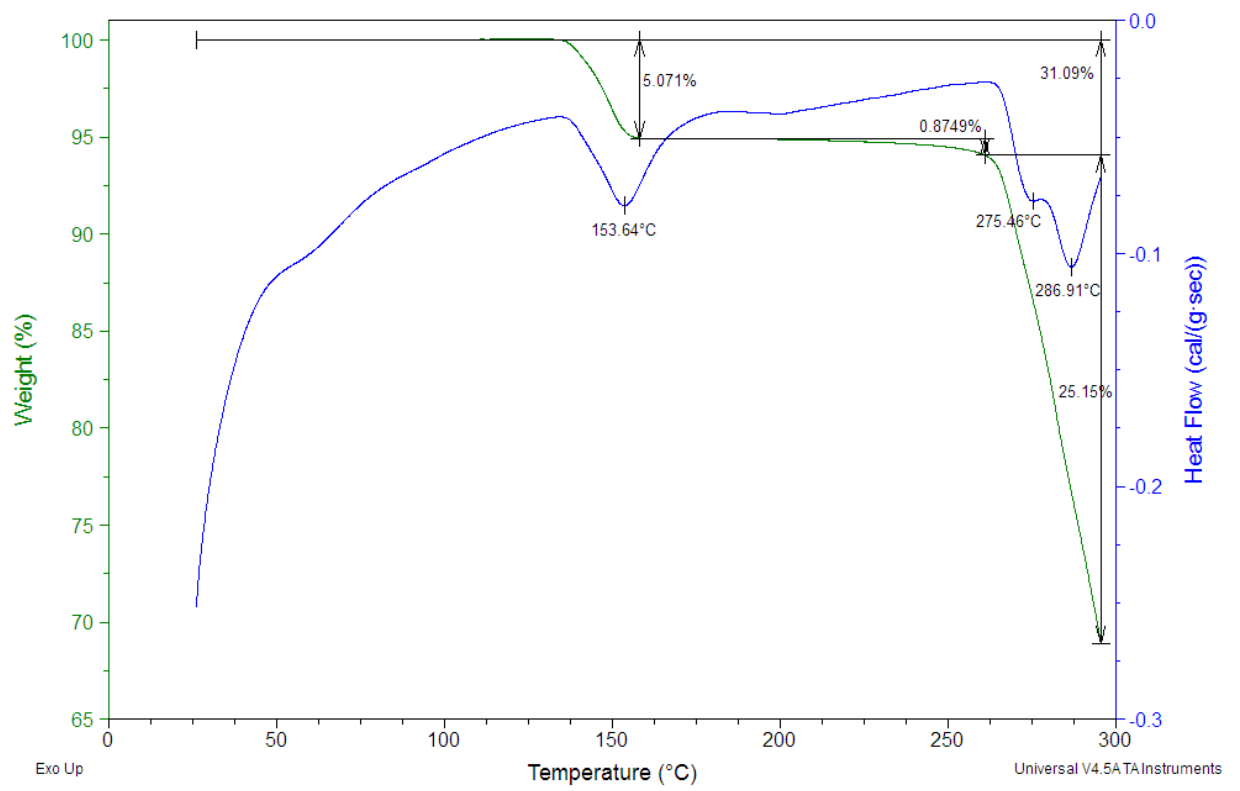

f (VII)

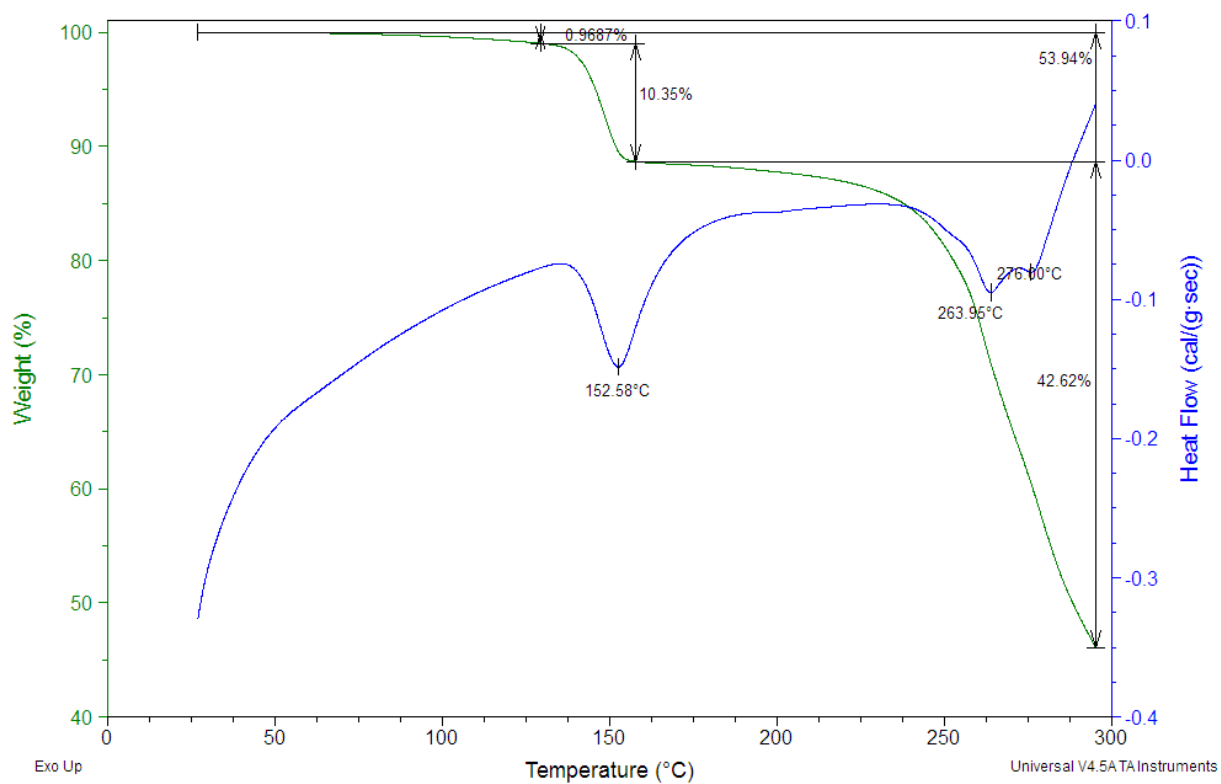

g (VIII)

**Fig. S6.** TG (green) and DTA (blue) curves on heating compounds **I** (a), **II** (b), **IV-XIII** (c-g) under a flow of artificial air.



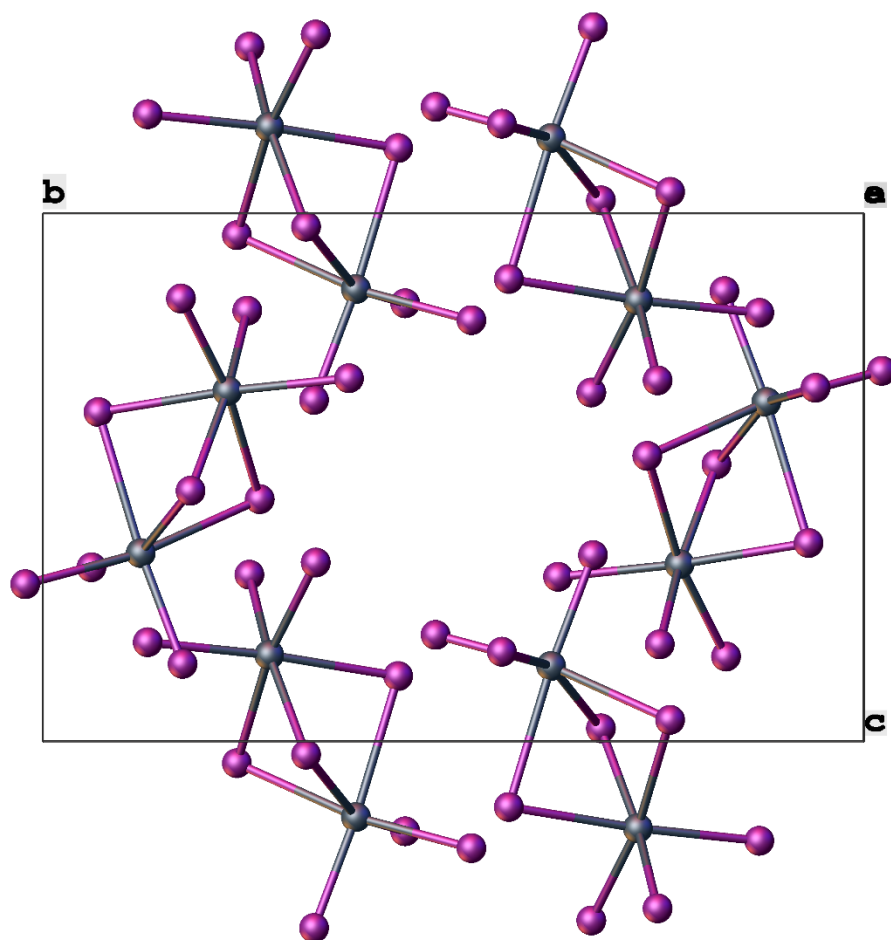

Fig. S7. Crystal packing of  $[\text{Bi}_2\text{I}_9]^{3-}$  anions in IX.

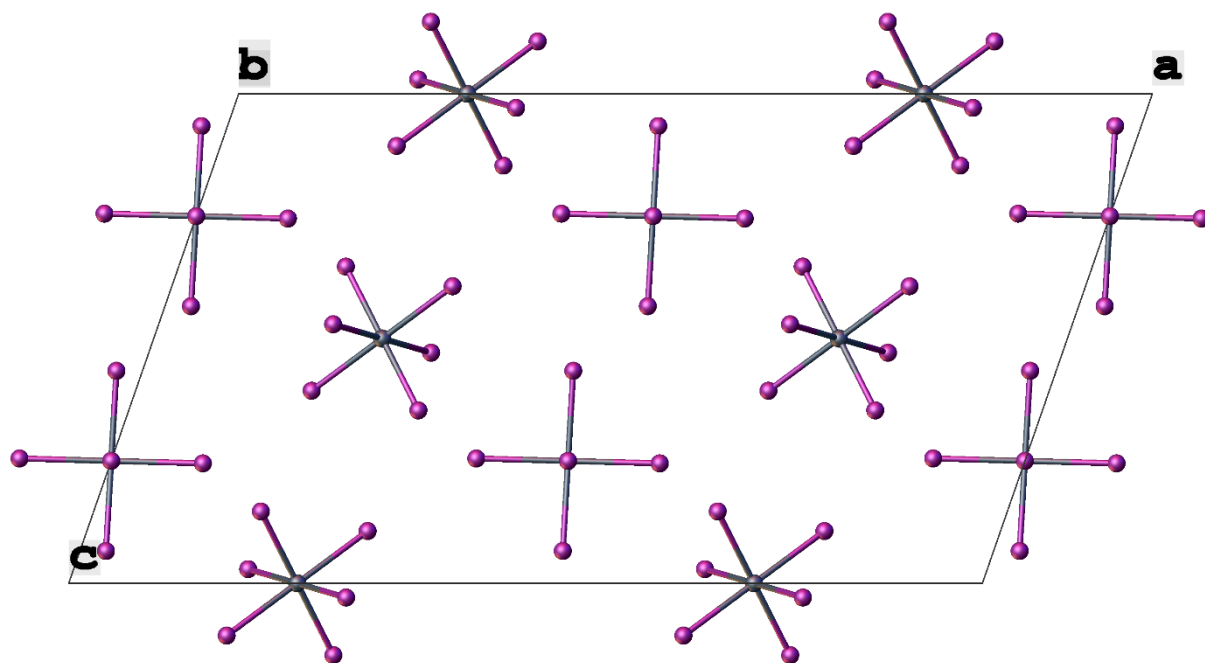

Fig. S8. Crystal packing of  $[\text{BiI}_6]^{3-}$  anions in XI.

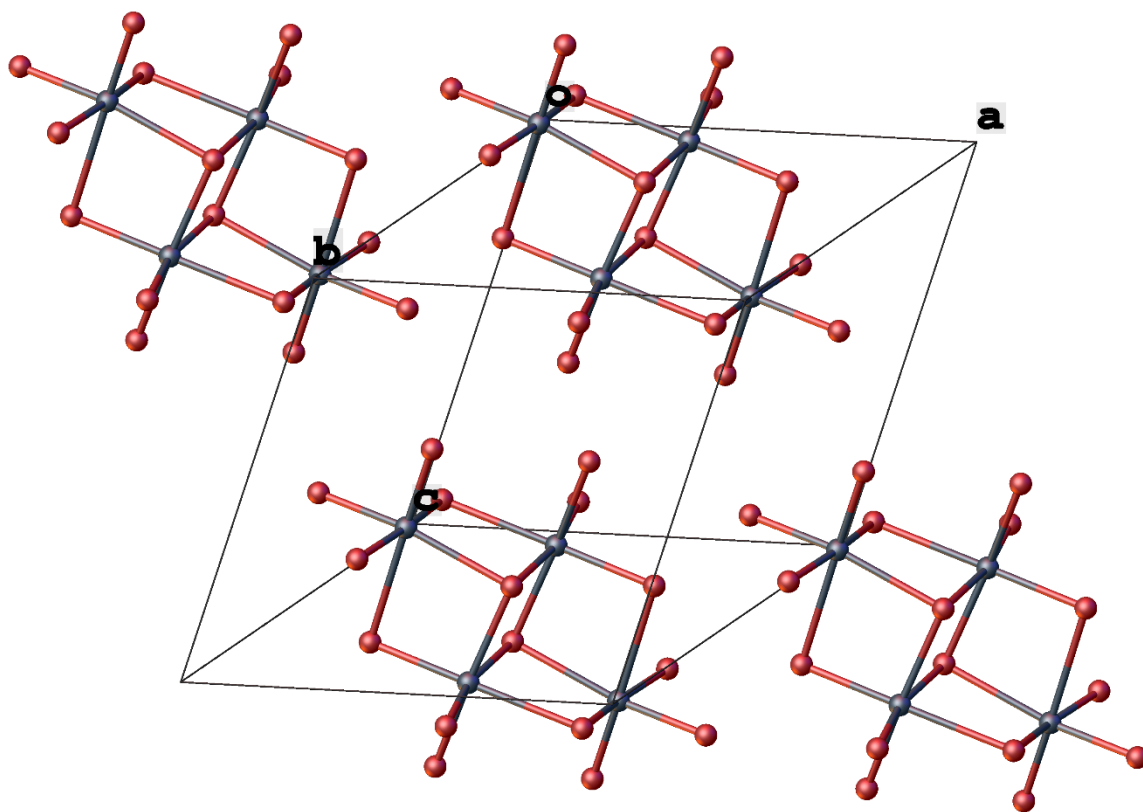

**Fig. S9.** Crystal packing of  $[\text{Bi}_4\text{Br}_{16}]^{4-}$  anions in **XII**.

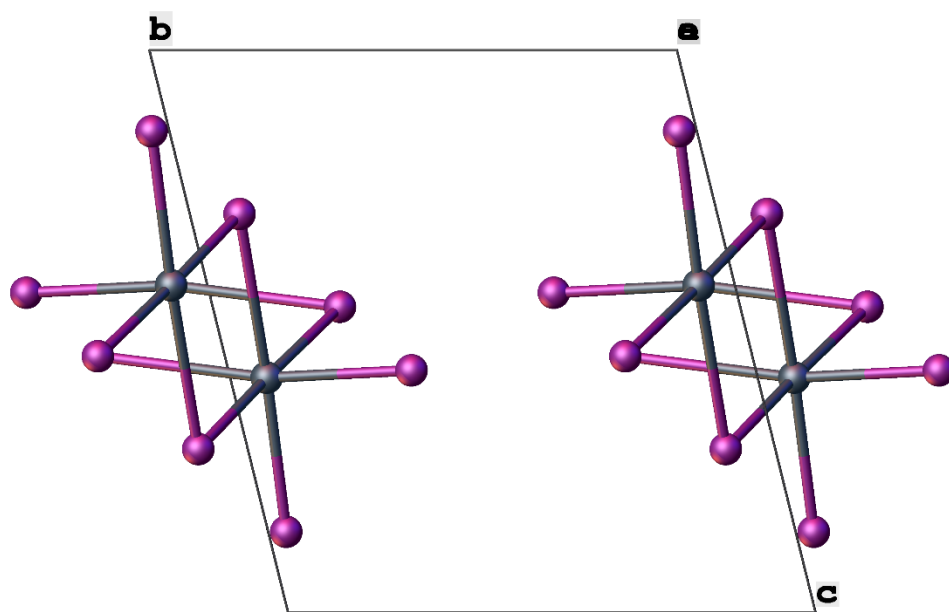

**Fig. S10.** Crystal packing of  $[\text{Bi}_4]_n^-$  anions in **XIII**.

## Resulting CONTCAR files for compounds III and X (VASP program optimization result)

### III

1.0000000000000000  
12.7899999618999995 0.0000000000000000 0.0000000000000000  
2.4302152146000000 14.5676839816000001 0.0000000000000000  
5.5123629742000002 6.4832700844000000 17.1619755480999991

Bi Br N C H  
4 24 12 108 108

Direct

0.4932384042310835 0.9842968053313990 0.2523844894970186  
0.5067615957689164 0.0157031946686008 0.7476155105029817  
-0.0000000000000000 0.4999999400000021 0.5000000599999979  
-0.0000000000000000 0.5000000599999979 0.0000000000000000  
0.6548145468100338 0.9184770997216940 0.1384022958050259  
0.3451854531899664 0.0815228852783076 0.8615976891949768  
0.3661636717220709 0.8164102247799105 0.2980745266941260  
0.6338363282779295 0.1835897902200862 0.7019255033058764  
0.3702926823587293 0.0850483447458101 0.1375190166846155  
0.6297073176412706 0.9149516702541947 0.8624810123153834  
0.6039125987343692 0.1600733522527433 0.2016030207957534  
0.3960874012656306 0.8399266477472561 0.7983969642042493  
0.8830944592319058 0.3832391481521349 0.4599371093685841  
0.1169055407680943 0.6167608518478647 0.5400628906314167  
0.0975509492483946 0.5953237812068001 0.3361840788523914  
0.9024490507516051 0.4046762187932001 0.6638158911476136  
0.1581382538603249 0.6146063046300014 0.8706221202613644  
0.8418617461396747 0.3853936953699986 0.1293778947386331  
0.1665933122695737 0.3386350329998926 0.0138240819806593  
0.8334066877304264 0.6613649370001049 0.9861759030193437  
0.9293750802908902 0.4341162748107897 0.8985845290521685  
0.0706249197091092 0.5658837251892090 0.1014155009478345  
0.6229672581504070 0.8959885592851377 0.3661515199853552  
0.3770327418495930 0.1040114407148619 0.6338484800146464  
0.8246515329583085 0.6537637011299977 0.4896660789197599  
0.1753484670416922 0.3462362988700015 0.5103339210802411  
0.3423958564205804 0.0426347633133920 0.3749957641141778  
0.6576041435794192 0.9573652516866133 0.6250042658858252  
0.3375963099129600 0.7222662294940170 0.0360998007328268  
0.6624036900870386 0.2777338005059862 0.9639001992671739  
0.9377367427964506 0.1406597133294383 0.0379238924743974  
0.0622632572035502 0.8593402566705670 0.9620760775255998  
0.0445893170176843 0.8559814161102082 0.4361451702823677  
0.9554106829823156 0.1440186128897902 0.5638547997176365  
0.6180595893605038 0.2729243655611356 0.4527126834610505  
0.3819404106394964 0.7270756634388710 0.5472872875389516  
0.6751047958163430 0.6513484659185568 0.2177496687614418  
0.3248952041836567 0.3486515340814423 0.7822503312385585  
0.2668924113467058 0.3097911782714027 0.2908366272914824  
0.7331075886532937 0.6902088217285975 0.7091633727085177  
0.2870176015714562 0.6952902084431770 0.1131070472659686  
0.7129823984285446 0.3047097915568224 0.8868929677340291

0.2898089134403334 0.7533843334121924 0.1545004227189303  
0.7101910865596669 0.2466156665878071 0.8454995622810720  
0.3457438129228451 0.8395209976453973 0.1166156701198863  
0.6542561870771549 0.1604790173546058 0.8833843598801165  
0.3984775932532435 0.8647493612965156 0.0378751000009758  
0.6015224067467564 0.1352506247034830 0.9621249289990229  
0.3929439116035738 0.8049553111384907 -0.0015292576334728  
0.6070560883964263 0.1950447038615068 0.0015292876334753  
0.3324990791730598 0.6599681444531971 0.9920249173894636  
0.6675009208269395 0.3400318555468024 0.0079750826105358  
0.4200329128307760 0.5776333375958523 0.9977022158060924  
0.5799670871692236 0.4223666334041485 0.0022977691939104  
0.3894218396039506 0.4808557490517868 0.0265994210330110  
0.6105781603960488 0.5191442509482126 0.9734005939669935  
0.4688879916482148 0.4037043386137540 0.0288448214979488  
0.5311120083517848 0.5962956613862460 0.9711551485020558  
0.0163923886119762 0.1850026707423353 0.9742152693625185  
0.9836076113880237 0.8149973442576623 0.0257847456374789  
0.0269776798376887 0.1719118039750944 0.9045126714237299  
0.9730223201623122 0.8280882260249079 0.0954873285762694  
0.9553670487791431 0.1137337729179025 0.9003026706345725  
0.0446329512208569 0.8862662270820981 0.0996973593654294  
0.8757062263664719 0.0678477372110910 0.9671654054236047  
0.1242937736335288 0.9321522927889108 0.0328345795763983  
0.8680333378928469 0.0825899244855091 0.0355462333612418  
0.1319666621071534 0.9174100605144931 0.9644537516387605  
0.9235708934334909 0.1598270546221143 0.1113895680843976  
0.0764291065665093 0.8401729603778904 0.8886104319156025  
0.9579920366699358 0.0738124154217482 0.1761367069265345  
0.0420079633300647 0.9261876145782471 0.8238633230734677  
0.0657528606294395 0.0617014876981981 0.1837148767210996  
0.9342471393705609 0.9382984823017992 0.8162851232789010  
0.0970160120637632 0.9842650207732894 0.2451141055054439  
0.9029839879362377 0.0157350092267136 0.7548858944945567  
0.0209398021472517 0.9170624546381350 0.2998953125080719  
0.9790601978527486 0.0829375303618670 0.7001046874919283  
0.9135645951562045 0.9288411682831451 0.2920010385647434  
0.0864354048437953 0.0711588317168551 0.7079989914352588  
0.8819930808861741 0.0069136191727822 0.2310859581889515  
0.1180069191138259 -0.0069135891727869 0.7689140118110535  
0.0543702206238120 0.8316979220478016 0.3655670621052257  
0.9456297793761878 0.1683020629521932 0.6344329378947736  
0.1352913130375442 0.8742474663591803 0.4500259541198739  
0.8647086869624554 0.1257525476408206 0.5499740748801250  
0.1292546875826397 0.8898723160158964 0.5179953169724062  
0.8707453124173601 0.1101276549841048 0.4820046830275936  
0.0291668558462363 0.8857134072896282 0.5723743191365933  
0.9708331441537638 0.1142865927103713 0.4276256808634068  
0.9362532890426493 0.8684253672736520 0.5562303746575255  
0.0637467109573512 0.1315746027263458 0.4437696253424738  
0.9459616325960581 0.8536104176118575 0.4874642094852779  
0.0540383674039418 0.1463895673881445 0.5125357605147264

0.5905533687373857 0.1879974598625495 0.4528342611450052  
0.4094466312626136 0.8120025101374480 0.5471657388549952  
0.6346981204905204 0.1595518596337722 0.3887204925061286  
0.3653018795094797 0.8404481253662230 0.6112794774938757  
0.7089899170898124 0.2186138063118269 0.3250170060592246  
0.2910100829101882 0.7813862226881726 0.6749829939407764  
0.7354926586210908 0.3057541353324543 0.3263136450126131  
0.2645073413789093 0.6942458646675463 0.6736863549873872  
0.6881785953087547 0.3321141755760891 0.3908263363848685  
0.3118214046912455 0.6678858244239113 0.6091736636151309  
0.5790876038085491 0.2972561238034393 0.5249338963723357  
0.4209123961914514 0.7027438761965603 0.4750661036276637  
0.5390338058935535 0.4025182735502359 0.5108607754822174  
0.4609661941064460 0.5974817554497631 0.4891392245177823  
0.5950732041102097 0.4639166501330475 0.5261965194991296  
0.4049267958897897 0.5360833498669521 0.4738034805008701  
0.5562078077207906 0.5607875990903126 0.5152709431520869  
0.4437921922792092 0.4392124009096876 0.4847290568479129  
0.6466850256219032 0.6875370099231540 0.2762508784176268  
0.3533149743780971 0.3124629900768457 0.7237491215823738  
0.7158471020842767 0.6711914664280970 0.3242171279361616  
0.2841528979157232 0.3288085335719023 0.6757828720638392  
0.8150020514798914 0.6171907155462831 0.3118131923446372  
0.1849979485201087 0.3828092844537181 0.6881868376553643  
0.8427701213171604 0.5813283406414607 0.2507683802881333  
0.1572298786828388 0.4186716593585394 0.7492316047118689  
0.7715154797219537 0.5993150484782951 0.2040247306010870  
0.2284845202780456 0.4006849515217042 0.7959752403989147  
0.5962009890899111 0.6643878519476707 0.1700698868350155  
0.4037990109100887 0.3356121480523300 0.8299301131649844  
0.5289133895417220 0.5758335326002494 0.2049532666137023  
0.4710866104582770 0.4241664673997514 0.7950467333862986  
0.5611673212660999 0.4976764098587020 0.1776439662824018  
0.4388326787339000 0.5023236201413007 0.8223560037176019  
0.5062941809209084 0.4113665237865951 0.2154939662799356  
0.4937058190790913 0.5886334762134047 0.7845060487200615  
0.4184376004460865 0.4024732164639995 0.2807708316929876  
0.5815623695539117 0.5975267835360005 0.7192291683070127  
0.3841580331045041 0.4818125683148688 0.3066062891111515  
0.6158419668954950 0.5181874016851359 0.6933937108888489  
0.4392549884708439 0.5678728118109042 0.2690107953955854  
0.5607450115291566 0.4321271881890962 0.7309892046044155  
0.3603518807875350 0.3085023874208904 0.3230118233662274  
0.6396481192124653 0.6914976125791095 0.6769881766337730  
0.2816331219285998 0.2683938564374801 0.2363785009532805  
0.7183668480713965 0.7316061735625229 0.7636214840467228  
0.1968194293010409 0.2717224226612050 0.2039933169044748  
0.8031805416989599 0.7282776073387969 0.7960066980955233  
0.0960889069650159 0.3181605099683058 0.2275877631716427  
0.9039110640349849 0.6818394600316980 0.7724122668283600  
0.0824632120787266 0.3586612291275722 0.2847698015075819  
0.9175367879212731 0.6413387708724290 0.7152301984924184

0.1693511305363903 0.3539468325143427 0.3156445457064774  
0.8306488694636098 0.6460531974856597 0.6843554542935234  
0.2440276495337242 0.6279026474989267 0.1385032840330413  
0.7559723504662754 0.3720973225010711 0.8614967459669609  
0.2481422297747606 0.7301483734143750 0.2162330529286110  
0.7518577702252393 0.2698516265856248 0.7837669770713918  
0.3482507993352558 0.8864565630303654 0.1482964226499732  
0.6517492006647431 0.1135434519696396 0.8517036073500225  
0.4429938370889049 0.9309556044306970 0.0053949072237344  
0.5570061629110956 0.0690443955693024 0.9946050627762701  
0.4303299799390798 0.8218703075770762 0.9365116817876965  
0.5696700200609198 0.1781297074229222 0.0634883332123080  
0.2508582062200579 0.6311252989813334 0.0148796089642287  
0.7491417937799418 0.3688747010186660 0.9851203910357705  
0.3407051247980325 0.7093464006561879 0.9311991363614729  
0.6592948752019674 0.2906535993438126 0.0688008346385275  
0.3028812405525733 0.4659845787303441 0.0465997506609912  
0.6971187594474267 0.5340154212696565 0.9534002193390130  
0.4431900665620597 0.3287069892617017 0.0516253838423177  
0.5568099334379401 0.6712930107382979 0.9483746461576841  
0.0682448414298557 0.2312729766491802 0.9812626112478772  
0.9317551585701443 0.7687269933508177 0.0187373597521234  
0.0908975952917197 0.2082609740542938 0.8541132091893521  
0.9091024047082800 0.7917390549457051 0.1458867608106454  
0.9612404281670892 0.1042949292778652 0.8455884330609015  
0.0387595718329113 0.8957050407221403 0.1544115819390960  
0.8180521095212404 0.0211470791429315 0.9672660320961266  
0.1819478904787603 0.9788529208570688 0.0327339389038745  
0.8061203056588255 0.0493612479986270 0.0889070183494883  
0.1938796943411744 0.9506387670013698 0.9110929816505114  
0.8365414270462668 0.1813577091797803 0.1294064896355927  
0.1634585729537328 0.8186422608202173 0.8705934953644099  
0.9706387810148889 0.2234570386912811 0.0953534183429994  
0.0293612189851118 0.7765429613087197 0.9046465966570054  
0.1262967867883703 0.1130298795956580 0.1415022824691829  
0.8737032132116291 0.8869701354043402 0.8584977025308181  
0.1816571532063215 0.9762058211532411 0.2493367438719246  
0.8183428467936786 0.0237942088467622 0.7506632261280737  
0.8530254799853928 0.8769770806948333 0.3332833391994831  
0.1469745200146073 0.1230229493051688 0.6667166608005181  
0.7970744912302860 0.0153441936657882 0.2273963220065148  
0.2029255087697140 0.9846557763342110 0.7726036779934844  
0.1399615290367438 0.8062488862312022 0.3480810324441285  
0.8600384709632569 0.1937511137687976 0.6519189965558712  
0.0032117959137521 0.7696160863924137 0.3849060203806857  
0.9967882040862482 0.2303839286075834 0.6150939796193152  
0.2113631294218339 0.8757334060864573 0.4054953474501116  
0.7886368705781659 0.1242666239135456 0.5945046225498930  
0.2036454404908443 0.9063698882633193 0.5263353414383017  
0.7963545595091559 0.0936300817366852 0.4736646585616985  
0.0229348643924174 0.8968951045048168 0.6265724305146346  
0.9770651356075828 0.1031049254951861 0.3734275694853657

0.8554504205865923 0.8682510512946894 0.5957263376274160  
0.1445495794134085 0.1317489637053083 0.4042736623725846  
0.8775713543652358 0.8367312371457325 0.4723138898133039  
0.1224286456347637 0.1632687928542637 0.5276860801867014  
0.5334838815505029 0.1453653725342670 0.5057021012237723  
0.4665161184494968 0.8546346124657292 0.4942978987762275  
0.6110461810117613 0.0916733688250984 0.3890101258969932  
0.3889538189882389 0.9083266311749015 0.6109898741030061  
0.7445771595964368 0.1977942884058810 0.2739610876485051  
0.2554228404035633 0.8022056815941235 0.7260389423514976  
0.7917751428824003 0.3536099815780506 0.2765086198664954  
0.2082248571176000 0.6463900484219502 0.7234913801335034  
0.7055292902926347 0.3983137212279695 0.3965326575845339  
0.2944707097073661 0.6016862787720303 0.6034673424154666  
0.5150482609923220 0.2466654406774479 0.5635815885448144  
0.4849517390076788 0.7533345593225534 0.4364184114551870  
0.6480694146704380 0.2789142992670168 0.5521864716530304  
0.3519305853295625 0.7210856707329881 0.4478135283469693  
0.6705865467728938 0.4362647597867295 0.5451091113680443  
0.3294134532271069 0.5637352702132727 0.4548908886319546  
0.6022302724496286 0.6083195022447435 0.5257235290864669  
0.3977697275503717 0.3916804977552563 0.4742764709135329  
0.5678345272555234 0.7288958175161238 0.2826376670500423  
0.4321654727444775 0.2711041824838757 0.7173623029499548  
0.6927717783940620 0.7025798868001195 0.3698964106132849  
0.3072282216059378 0.2974201131998806 0.6301035893867165  
0.8710462607494502 0.6042422858330870 0.3484802641989244  
0.1289537392505492 0.3957577141669139 0.6515197358010740  
0.9209288896038730 0.5417762749738350 0.2370799908193902  
0.0790711103961276 0.4582237250261650 0.7629200391806120  
0.7888355207672686 0.5739403414121189 0.1551091168610396  
0.2111644792327302 0.4260596585878808 0.8448909131389626  
0.6446934291114927 0.6734934177067351 0.1105760806618304  
0.3553065708885070 0.3265065822932653 0.8894239193381696  
0.5467543621326757 0.7325036153505599 0.1700077733758741  
0.4532456378673250 0.2674963846494406 0.8299922566241285  
0.6310138409807636 0.5030895226348127 0.1278530786900405  
0.3689861590192366 0.4969104773651872 0.8721469363099644  
0.5335953405976748 0.3496487232303040 0.1952230686146801  
0.4664046594023253 0.6503512767696956 0.8047769613853223  
0.3143789085980390 0.4763516819893391 0.3564904541902059  
0.6856210914019617 0.5236483180106613 0.6435095158097988  
0.4127990886037349 0.6290204844014620 0.2901056738058985  
0.5872008813962619 0.3709795155985381 0.7098943261941026  
0.4143532543346404 0.2442560268866868 0.3179366858970044  
0.5856467456653592 0.7557439731133125 0.6820633141029961  
0.3258358448555170 0.2978903171856493 0.3849269292565927  
0.6741641551444825 0.7021096828143505 0.6150730707434088  
0.3619939408971599 0.2330538572761822 0.2204873911644305  
0.6380060891028428 0.7669461727238132 0.7795126088355697  
0.2116141413060484 0.2388229644234228 0.1597458552511442  
0.7883858886939541 0.7611770055765749 0.8402541737488541

0.0292945311757689 0.3233380524002899 0.2010595995333870  
 0.9707054688242384 0.6766619475997104 0.7989404004666130  
 0.0053576616297643 0.3937988290903327 0.3072123017381237  
 0.9946423683702380 0.6062011709096673 0.6927877282618792  
 0.1636679352940279 0.3839162010152757 0.3605964582399419  
 0.8363320797059701 0.6160838289847199 0.6394035417600585

FREE ENERGIE OF THE ION-ELECTRON SYSTEM (eV)

-----  
 free energy TOTEN = -1570.72554557 eV  
 energy without entropy= -1570.72554557 energy(sigma->0) = -1570.72554557

X

1.0000000000000000  
 9.4546003342000002 0.0000000000000000 0.0000000000000000  
 4.7107965786000001 12.4228095971000005 0.0000000000000000  
 3.3347927288000001 1.0397038526000000 13.4604361620000006

Bi Br N C H  
 2 12 6 54 56

Direct

-0.0000000000000000 0.0000000000000000 0.5000000599999979  
 0.4999999400000021 0.5000000599999979 0.0000000000000000  
 0.9627559798281641 0.1784104433764380 0.3453927578159832  
 0.0372440201718360 0.8215895866235642 0.6546072721840118  
 0.2494506062193073 0.6348779395251022 0.9080160983996178  
 0.7505493937806927 0.3651220604748976 0.0919839016003823  
 0.6600360396395418 0.6555380834323601 0.9389759668577133  
 0.3399639893604562 0.3444619165676400 0.0610240331422866  
 0.0912817381431986 0.1184297421660417 0.6175521562535276  
 0.9087182618568013 0.8815702578339584 0.3824478437464730  
 0.6874034528994375 0.0812362253490372 0.6015313449548219  
 0.3125965471005618 0.9187637746509624 0.3984686550451773  
 0.6501701165547354 0.3908068586711622 0.8191592278789238  
 0.3498299124452633 0.6091931413288374 0.1808407721210768  
 0.3106760077822411 0.3037798151072359 0.3371376576305037  
 0.6893239622177636 0.6962201848927639 0.6628623423694955  
 0.2942165877401501 0.3586310010273679 0.7196981710598946  
 0.7057833832598513 0.6413689989726318 0.2803018289401053  
 0.6857994247848820 0.0482683766891962 0.8535331902693143  
 0.3142005752151191 0.9517315933108076 0.1464668097306854  
 0.9553213302119632 0.4212122324440536 0.4719184581578810  
 0.0446786847880418 0.5787877675559457 0.5280815128421202  
 0.0804679240136179 0.4488579957336033 0.4127219918626116  
 0.9195320909863876 0.5511419742664012 0.5872779781373926  
 0.1194206829049689 0.4304068702148126 0.8655821633001698  
 0.8805793470950336 0.5695931587851858 0.1344178366998302  
 0.2596051966202470 0.4149247414105061 0.8001905963704679  
 0.7403948333797556 0.5850752585894941 0.1998094036295326  
 0.4492212554649718 0.3361214754707034 0.6555376523931963  
 0.5507787735350266 0.6638784945292928 0.3444623476068037  
 0.1680711321527242 0.3929481263323822 0.3195631003965192



0.8319288388472775 0.6070518736676176 0.6804368996034810  
0.4509975578300711 0.3076740771585627 0.2883711161164572  
0.5490024421699291 0.6923259228414379 0.7116288838835434  
0.8751738346230628 0.4720612334503684 0.5586908854371069  
0.1248261653769366 0.5279387965496334 0.4413091145628942  
0.5684551523223419 0.3906070160074426 0.4854749394565281  
0.4315448476776583 0.6093929839925580 0.5145250605434708  
0.4005444782888481 0.5332578181597184 0.5897254397639183  
0.5994555217111524 0.4667421818402819 0.4102745602360808  
0.1923548603698004 0.3179096802214213 0.6999711853337117  
0.8076451546302041 0.6820903197785787 0.3000288146662886  
0.0146219502213736 0.3869098836428997 0.8484848658486366  
0.9853780637786274 0.6130900863570984 0.1515151341513636  
0.4685079822300988 0.4232059009249878 0.5755590252134356  
0.5314920477698967 0.5767940990750126 0.4244409747865644  
0.5709700915520157 0.1349238361491168 0.3685445593357847  
0.4290299084479839 0.8650761338508799 0.6314554406642156  
0.6691939731663571 0.9559604488017333 0.8364120377787775  
0.3308060268336424 0.0440395211982641 0.1635879622212227  
0.5617498700778105 0.1338672467465164 0.8856142847358857  
0.4382501299221896 0.8661327382534783 0.1143857152641143  
0.4249738860826078 0.1341641532558426 0.4193667959477496  
0.5750261139173919 0.8658358467441577 0.5806332040522497  
0.9226177455168388 0.0253463179793112 0.9181260188875612  
0.0773822544831610 0.9746537120206916 0.0818739811124390  
0.5832181155690230 0.2229776798154610 0.3023374237258193  
0.4167818844309771 0.7770223061845377 0.6976626062741837  
0.0324084664060952 0.9287327122037669 0.9257158805361080  
-0.0324084664060952 0.0712673177962356 0.0742841194638926  
0.4139660527173676 0.1289595864966245 0.9009206011729638  
0.5860339772826282 0.8710403985033712 0.0990793988270362  
0.8795719531771384 0.1081191344239711 0.9919056613012031  
0.1204280468228615 0.8918808355760258 0.0080943386987967  
0.3938774418389867 0.0350302122573154 0.8828021562486461  
0.6061225281610116 0.9649698177426873 0.1171978437513541  
0.2957431041466134 0.2190994881214980 0.4018653630971746  
0.7042568658533908 0.7809005418784972 0.5981346079028265  
0.5237076525700975 0.9471769131689510 0.8513894684886939  
0.4762923474299027 0.0528230868310491 0.1486105315113061  
0.8443617524484835 0.0565572715144271 0.8303910385356313  
0.1556382475515160 0.9434427284855723 0.1696089614643688  
0.0517839837965463 0.3306347089629696 0.7640068637517762  
0.9482160012034557 0.6693652610370352 0.2359931362482236  
0.9211517631920739 0.3590632739770436 0.4501406783184141  
0.0788482518079245 0.6409367550229558 0.5498593216815859  
0.0971332079834967 0.4757579830557777 0.9293742003572238  
0.9028667920165033 0.5242419869442189 0.0706257996427761  
0.3481972725327900 0.4439489223801029 0.8112341218012274  
0.6518027274672107 0.5560510776198972 0.1887658781987723  
0.4775913686634763 0.2596169307081677 0.6231063064619258  
0.5224086613365264 0.7403830692918327 0.3768936935380739  
0.5297958672180747 0.3226913835946194 0.7053685325679357

|                    |                    |                    |
|--------------------|--------------------|--------------------|
| 0.4702041327819256 | 0.6773085864053781 | 0.2946314674320635 |
| 0.0986960475795378 | 0.3562434403738272 | 0.2928242140863681 |
| 0.9013039674204596 | 0.6437565296261714 | 0.7071757559136360 |
| 0.2052073359306776 | 0.4481046383265828 | 0.2600342133952767 |
| 0.7947926640693220 | 0.5518953326734176 | 0.7399658166047194 |
| 0.4529347885738093 | 0.3794785596411140 | 0.2391311062629705 |
| 0.5470652114261906 | 0.6205214403588860 | 0.7608689087370286 |
| 0.7785250866126842 | 0.4494565189958190 | 0.6048732526558571 |
| 0.2214749133873160 | 0.5505434510041858 | 0.3951267473441434 |
| 0.6244989999584452 | 0.3047322431464816 | 0.4746048290798647 |
| 0.3755010000415544 | 0.6952677568535184 | 0.5253951709201355 |
| 0.3219195536292952 | 0.5616049176539765 | 0.6589328549334307 |
| 0.6780804763706995 | 0.4383950823460231 | 0.3410671450665697 |
| 0.2284017391001072 | 0.2736205176571993 | 0.6337570369142993 |
| 0.7715982908998957 | 0.7263794823428009 | 0.3662429630857008 |
| 0.9052483257562169 | 0.3964876990708711 | 0.9006098082190968 |
| 0.0947516742437836 | 0.6035122709291336 | 0.0993901917809035 |
| 0.6743482820456383 | 0.0678057727417931 | 0.3802909312527751 |
| 0.3256517179543608 | 0.9321942422582041 | 0.6197090687472248 |
| 0.7753324413710357 | 0.8920944404063610 | 0.8084156346599043 |
| 0.2246675586289641 | 0.1079055745936359 | 0.1915843653400956 |
| 0.5840257776669669 | 0.2060183674796958 | 0.8965495993293949 |
| 0.4159742223330320 | 0.7939816475203091 | 0.1034504006706050 |
| 0.4073005066678569 | 0.0681372889402533 | 0.4718722283298183 |
| 0.5926994933321434 | 0.9318626810597443 | 0.5281277716701825 |
| 0.6947057224237949 | 0.2281263495382447 | 0.2621872660172704 |
| 0.3052942775762045 | 0.7718736504617558 | 0.7378127639827322 |
| 0.0620288814727850 | 0.8720074429794954 | 0.8690613513052666 |
| 0.9379711185272147 | 0.1279925420205070 | 0.1309386486947327 |
| 0.3172651332116030 | 0.1992356395520260 | 0.9278343451472848 |
| 0.6827348667883965 | 0.8007643604479734 | 0.0721656548527159 |
| 0.7541844809561032 | 0.1349471441089702 | 0.0238355976786529 |
| 0.2458155190438969 | 0.8650528258910265 | 0.9761644023213472 |
| 0.8952792426572989 | 0.1839822268832198 | 0.9535723207433311 |
| 0.1047207573427009 | 0.8160177881167778 | 0.0464276792566684 |
| 0.2781310515103836 | 0.0307244393318534 | 0.8927752208906795 |
| 0.7218689774896164 | 0.9692755606681468 | 0.1072247791093204 |
| 0.1791943217856481 | 0.2214345563675797 | 0.4380288648281735 |
| 0.8208056482143499 | 0.7785654436324200 | 0.5619711051718246 |
| 0.5145856697873465 | 0.8712922620551911 | 0.8380782452097695 |
| 0.4854143302126535 | 0.1287077229448103 | 0.1619217547902302 |
| 0.8308888805569471 | 0.1404008673474663 | 0.8013680248110036 |
| 0.1691111194430530 | 0.8595991176525359 | 0.1986319751889966 |
| 0.9101238037914898 | 0.0044506185698754 | 0.7697801811381076 |
| 0.0898761962085101 | 0.9955493664301270 | 0.2302198188618919 |
| 0.9728005452124807 | 0.2961803077066977 | 0.7469496790469614 |
| 0.0271994847875143 | 0.7038196922933023 | 0.2530503209530391 |

FREE ENERGIE OF THE ION-ELECTRON SYSTEM (eV)

-----  
free energy TOTEN = -792.02383179 eV  
energy without entropy= -792.02383179 energy(sigma->0) = -792.02383179
